# Supplementary material for: Lycorine Inhibits Angiogenesis by Docking to PDGFRα
Source: Research Square preprint supplement (doi:10.21203/rs.3.rs-1327411/v1), 2022-02-17
Supplement: Supplementary file 5 [file 8a22a85eb43654b5c7765ca0.xlsx]

## Sheet: summary
	mean	sd
Lyc, 0 uM	0.994341	0.00984242
Lyc, 6 uM	0.571508	0.0304027
Lyc, 12 uM	0.421437	0.0112509
sunitinib 1uM	0.470373	0.0158699
Lyc, 6 uM + sunitinib 1uM	0.34369	0.0167932

## Sheet: 1
	Lyc, 0 uM	Lyc, 6 uM	Lyc, 12 uM	sunitinib 1uM	Lyc, 6 uM + sunitinib 1uM
well1	1	0.551	0.462	0.406	0.399
well2	0.991	0.529	0.482	0.486	0.343
well3	1.025	0.509	0.426	0.454	0.355
mean	1.008	0.529667	0.456667	0.448667	0.365667
SD		0.0171529	0.0231709	0.0328769	0.024074

## Sheet: 2
	Lyc, 0 uM	Lyc, 6 uM	Lyc, 12 uM	sunitinib 1uM	Lyc, 6 uM + sunitinib 1uM
well1	1	0.6135	0.4065	0.5045	0.3105
well2	1.039	0.581	0.4165	0.4595	0.3805
well3	0.9865	0.6085	0.4665	0.4945	0.3305
mean	1.0085	0.601	0.429833	0.486167	0.3405
SD	0.0388551	0.0142887	0.0262467	0.0192931	0.0294392

## Sheet: 3
	Lyc, 0 uM	Lyc, 6 uM	Lyc, 12 uM	sunitinib 1uM	Lyc, 6 uM + sunitinib 1uM
well1	1	0.589571	0.442571		0.325857
well2	0.983286	0.583857	0.428286	0.479143	0.334429
well3	0.980429	0.578143	0.442571	0.473429	0.314429
mean	0.987905	0.583857	0.43781	0.476286	0.324905
SD	0.00485621	0.00466569	0.00673435	0.00285714	0.00819269
