# Supplementary material for: Lycorine Inhibits Angiogenesis by Docking to PDGFRα
Source: Research Square preprint supplement (doi:10.21203/rs.3.rs-1327411/v1), 2022-02-17
Supplement: Supplementary file 8 [file 04a5a1346cb96d76bbfd7c04.xlsx]

## Sheet: predicted targets
ARNT
PLAU
NOS2
ANGPT4
NRP2
TIMP3
VWF
ADM
MET
EGF
ECM1
THBS2
TGFA
ITGA5
CEACAM1
PDGFRA
VTN
BMP6
COL4A2
MAPK14
ACVRL1
CFTR
DACH1
CYP4A11
SLC22A1
MECP2
CASR
NKX2-1
ACSL4
CPS1
CRHR1
COL1A1
AKAP12
AKT1
SGK3
UNC13B
WDR1
MT2A
NPAS4
DDIT3
GSTP1
TNNI3
EGR1
NR4A2
DAO
TYROBP
HDAC4
NOS1
CANX
PAWR
GABARAP
INHBA
CHRNA5
P2RY1
GHRL
CCNB1
HDAC2
NEFH
PLA2G4A
AFP
CXADR
SGK1
CALM1
CRHR2
DLG4
KLRK1
HTR4
PROS1
ADORA3
MTHFD2
NQO1
ABCC1
MTHFR
F10
PRKAB1
PRKAG2
RRM2
EDNRA
PRKAG3
PNP
PRKAA2
KHDRBS1
CSK
F2RL2
PARD6A
HRH2
HTR1F
SOAT1
HTR2B
MAPK3
MAPK8
SMG1
CTNND1
VASH2
FBN3
RBM20
CEPT1
WNT8B
NT5DC1
RIMS2
SHANK1
SLCO3A1
SYPL1
GPR37
UHMK1
PHOX2B
DMRTA1
MT3
ALAS2
ATP1A2
CYP21A2
HSD17B6
PYDC2
AVPR2
CAMK2D
HTR1A
LRRK1
SHISA7
C5AR2
ADCYAP1R1
CHRM3
FOXB1
TAS2R5
AGMAT
DBH
ARCN1
HCN4
NOL3
GLRA4
RNF207
GLRA2
SPX
KLRC4-KLRK1
GART
PLA2R1
AKR1C2
IGSF9B
DSC2
DCSTAMP
FAM20C
NETO1
SIGLEC15
WNK4
STX1A
HSD17B10
LY6E
FAM101B
GSG1L
ENTPD6
SCN7A
GJB4
HEXB
GABARAPL2
PPP5C
HMGCS1
CASQ1
KCNIP1
DVL1
HOXB1
SEPN1
ASNS
GLRA3
CDKL5
MT1B
ADCY5
MC4R
GIT2
MT1A
AKAP9
C8orf44-SGK3
HSD17B12
FAM132B
PLCL2
SCN8A
HSD3B2
CHD7
CACNA1E
ZNF658
CRHBP
GAD2
HSD17B8
MT1E
GNMT
SLC9A3R1
VAMP8
UBR3
PADI2
NLGN4X
TMEM163
HVCN1
SHISA9
TAS2R1
GRID2
CALM2
FBXO32
WLS
GLRB
PLA2G4F
TRAK1
RDH8
STX8
P2RX3
SCP2
HMBS
RIMS1
PEX13
UNC79
SPR
KCNE2
ZNF664-FAM101A
SYP
UNC13A
RNF180
ADCY2
HSD17B7
WNK3
GUCY2C
SGK2
CALM3
SYNGR1
ALAD
ATP2B2
MT1G
DHRS9
MYOG
CHRM2
CHRNB4
KCNAB1
TNNI3K
MT1F
NETO2
ATAD1
SCNN1B
TMEM181
STARD3
CHRM4
LHB
SHISA6
PHAX
ADRA2B
KCNIP3
SCRIB
CEND1
GLRA1
HOXA1
SHISA8
A4GALT
PDE1B
PPFIA3
TRIM63
KLHL17
AKR1C1
CHRNB1
CTNNA2
SRR
CHRNA3
CYP4F8
COX6B2
ARSB
VTI1B
KCNE1
TRPA1
FOLR2
MTFMT
SHMT1
RYR1
PROZ
SHMT2
CHRNA2
NQO2
FOLR3
FTCD
HTR3A
MTR
MTHFD1
GGCX
CHRNA10
ALDH1L1
VKORC1L1
AMT
PRKAG1
POLE
PPAT
POLE2
POLE3
OGDHL
POLA1
RRM2B
ACADSB
ALDH5A1
PRKAB2
POLE4
RRM1
PDE4D
TUBAL3
ERK
TOP2B
PARD3
CHRM5
P2RX6
PKP4
HTR3D
HTR7
SLC15A1
HTR3B
HTR3E
PARD6G
HTR1E
HTR6
FPGS
NPC1L1
AVPR1B
SLC15A2
ADAM19
SLCO2B1
HTR3C
HTR1D
SLC6A2
ZNF471
ZNF99
KRTAP10-11
CCDC117
ATP13A3
TGM5
RAB19
RAB41
ARMC2
WDHD1
C17orf51
FDX1L
CCL4L1
KRTAP4-3
MPV17
INPP5F
DIRAS1
UAP1L1
KRTAP8-1
LOC101060321
PAPOLB
ZNF532
SLC25A26
SLC25A33
OR1J1
CEACAM19
MUM1
ZNF366
C7orf69
FMR1NB
STON1-GTF2A1L
C1orf137
C5orf66
CCDC182
KRT83
ANGEL2
TMEM179B
PRAMEF16
ERV3-1
OR2J2
TRIM64
FIGN
MOXD1
EIF3CL
GOLT1A
ZNF845
RSPO4
NSUN5
FAM71D
PLA2G2D
VWA3B
ZNF705A
RAET1L
TYW5
OR6N2
DGAT2
OR10A4
FPR3
PRSS56
MARVELD3
GALNT16
RNF224
OR4C15
LGALS9C
C17orf99
SPTSSB
STARD7
PASD1
OR2C1
TMEFF1
DHRS11
FAM133A
GPR152
C1orf185
SPATA31D1
ATP6V0E2
C3orf67
C6orf1
KRT39
ZNF556
DEFB123
KCNH3
FAM47E
AGAP9
WDR49
CAMKMT
FAM149A
ZNF445
ESRP1
OR2Z1
CBY3
ATG2B
TMEM119
PRH1
ZNF878
ZNF260
SPACA7
C12orf54
SCP2D1
ZNF710
PROB1
MED12L
HENMT1
MRS2
C1orf146
LRIT3
PRAMEF2
DGCR6
CCDC150
TRIM49C
POM121L12
ERVFRD-1
NEURL3
IGSF11
SLC35B3
AEN
BLID
MOGAT2
MTMR1
ANKRD22
UROC1
VSIG2
RNASE11
TMEM86A
ITIH5
TMEM211
LOC100996721
SIAE
TMEM132E
SLC25A23
PGBD5
PCP4L1
NT5C1A
OR10AG1
DUX5
CELA2B
ZNF80
ZNF285
TP53I13

## Sheet: GO_BP
Category		Count	%	PValue	Genes	List Total	Pop Hits	Pop Total	Fold Enrichment	Bonferroni	Benjamini	FDR
GOTERM_BP_DIRECT	response to hypoxia	11	11.2245	5.71e-08	NR4A2, MECP2, ACVRL1, EGR1, EDNRA, NOS2, PLAU, ARNT, MTHFR, ADM, NOS1	98	172	16792	10.9582	7.43e-05	7.43e-05	7.28e-05
GOTERM_BP_DIRECT	response to drug	12	12.2449	1.43e-06	COL1A1, HDAC4, HDAC2, ABCC1, CCNB1, PNP, CPS1, HTR1F, HTR2B, MTHFR, TGFA, INHBA	98	304	16792	6.76369	0.00185529	0.000929	0.000909
GOTERM_BP_DIRECT	positive regulation of endothelial cell proliferation	7	7.14286	2.84e-06	ACVRL1, NRP2, VASH2, HTR2B, ARNT, AKT1, BMP6	98	69	16792	17.383	0.00369181	0.00123288	0.00120731
GOTERM_BP_DIRECT	activation of MAPK activity	5	5.10204	1.21e-05	MAPK8, SGK3, MAPK14, SGK1, MAPK3	98	25	16792	34.2694	0.0155771	0.0039249	0.00384351
GOTERM_BP_DIRECT	regulation of cell migration	13	13.2653	4.07e-05	ACVRL1, HDAC4, EGR1, HDAC2, EGF, ARNT, INHBA, MECP2, COL1A1, DDIT3, NKX2-1, NOS1, MAPK3	98	515	16792	4.32526	0.0515596	0.00908662	0.00889819
GOTERM_BP_DIRECT	angiogenesis	9	9.18367	4.47e-05	ACVRL1, ANGPT4, CEACAM1, NRP2, COL4A2, EGF, TGFA, ITGA5, MAPK14	98	223	16792	6.91535	0.0565552	0.00908662	0.00889819
GOTERM_BP_DIRECT	nitric oxide biosynthetic process	4	4.08163	5.12e-05	NQO1, NOS2, AKT1, NOS1	98	13	16792	52.7221	0.0645448	0.00908662	0.00889819
GOTERM_BP_DIRECT	cellular response to mechanical stimulus	6	6.12245	5.58e-05	COL1A1, HDAC4, MAPK8, AKT1, BMP6, MAPK3	98	71	16792	14.48	0.0701156	0.00908662	0.00889819
GOTERM_BP_DIRECT	regulation of signal transduction by p53 class mediator	7	7.14286	8.2e-05	HDAC2, PRKAA2, PRKAG2, AKT1, MAPK14, PRKAB1, PRKAG3	98	124	16792	9.67281	0.101266	0.0111629	0.0109314
GOTERM_BP_DIRECT	peptidyl-serine phosphorylation	7	7.14286	8.57e-05	SMG1, MAPK8, AKT1, SGK3, MAPK14, SGK1, MAPK3	98	125	16792	9.59543	0.105628	0.0111629	0.0109314
GOTERM_BP_DIRECT	positive regulation of angiogenesis	3	3.06122	9.87e-05	MAPK8, MAPK14, MAPK3	98	3	16792	171.347	0.120605	0.0116832	0.0114409
GOTERM_BP_DIRECT	positive regulation of transcription from RNA polymerase II promoter	17	17.3469	0.000148	ACVRL1, HDAC4, EGR1, HDAC2, ARNT, INHBA, MAPK14, BMP6, NR4A2, NPAS4, DDIT3, P2RY1, NKX2-1, AKT1, NOS1, MET, MAPK3	98	981	16792	2.96931	0.175364	0.0160666	0.0157334
GOTERM_BP_DIRECT	cell cycle arrest	7	7.14286	0.000166	KHDRBS1, PRKAA2, DDIT3, PRKAG2, INHBA, PRKAB1, PRKAG3	98	141	16792	8.50659	0.194724	0.0166579	0.0163125
GOTERM_BP_DIRECT	protein phosphorylation	11	11.2245	0.000301	ACVRL1, MAPK8, PRKAA2, PRKAG2, AKT1, CSK, SGK3, SGK1, PRKAB1, PRKAG3, MAPK3	98	456	16792	4.13337	0.324647	0.0264126	0.0258648
GOTERM_BP_DIRECT	signal transduction	18	18.3673	0.000324	UNC13B, ACVRL1, KHDRBS1, PRKAA2, CHRNA5, EGF, WNT8B, ADM, MAPK14, PRKAB1, NR4A2, EDNRA, KLRK1, TYROBP, DLG4, PLAU, AKT1, MET	98	1161	16792	2.65654	0.344581	0.0264126	0.0258648
GOTERM_BP_DIRECT		6	6.12245	0.000325	VWF, WDR1, EGF, PROS1, TIMP3, CALM1	98	103	16792	9.98138	0.344705	0.0264126	0.0258648
GOTERM_BP_DIRECT	cell adhesion	5	5.10204	0.000424	SMG1, MAPK8, PRKAA2, SGK3, SGK1	98	61	16792	14.0448	0.424521	0.0324962	0.0318224
GOTERM_BP_DIRECT	cellular response to corticotropin-releasing hormone stimulus	3	3.06122	0.000488	NR4A2, CRHR1, CRHR2	98	6	16792	85.6735	0.470326	0.0338672	0.0331649
GOTERM_BP_DIRECT	endodermal cell differentiation	4	4.08163	0.000494	VTN, COL4A2, INHBA, ITGA5	98	27	16792	25.3847	0.474621	0.0338672	0.0331649
GOTERM_BP_DIRECT	platelet activation	6	6.12245	0.000539	COL1A1, VWF, P2RY1, AKT1, F2RL2, MAPK3	98	115	16792	8.93984	0.504328	0.0350825	0.034355

## Sheet: GO_CC
Category		Count	%	PValue	Genes	List Total	Pop Hits	Pop Total	Fold Enrichment	Bonferroni	Benjamini	FDR
GOTERM_CC_DIRECT	extracellular region	24	24.4898	9.14e-06	ANGPT4, NRP2, CXADR, F10, VWF, WDR1, EGF, PROS1, VASH2, WNT8B, ADM, INHBA, THBS2, BMP6, COL1A1, VTN, PNP, COL4A2, PLAU, TIMP3, GHRL, CALM1, MET, F2RL2	98	1610	18224	2.77206	0.00171778	0.00144911	0.00137203
GOTERM_CC_DIRECT	extracellular matrix	36	36.7347	2.18e-05	HDAC4, KHDRBS1, SMG1, PRKAA2, WDR1, GSTP1, CTNND1, PRKAG2, PRKAG3, GABARAP, MECP2, MT2A, MAPK8, CCNB1, PARD6A, PNP, AKT1, TNNI3, CSK, NOS1, MAPK3, UNC13B, NQO1, RRM2, NOS2, PLA2G4A, MTHFR, MAPK14, PRKAB1, DAO, MTHFD2, DDIT3, SGK3, CALM1, SGK1, CFTR	98	3315	18224	2.01947	0.00409206	0.00144911	0.00137203
GOTERM_CC_DIRECT	cell surface	4	4.08163	2.34e-05	PRKAA2, PRKAG2, PRKAB1, PRKAG3	98	11	18224	67.6215	0.00438673	0.00144911	0.00137203
GOTERM_CC_DIRECT	plasma membrane	43	41.8367	3.08e-05	ACVRL1, NRP2, CHRNA5, GSTP1, PROS1, CTNND1, SLC22A1, HTR2B, TGFA, HTR4, GABARAP, CRHR1, CRHR2, AKAP12, EDNRA, KLRK1, PARD6A, HRH2, PLAU, ADORA3, P2RY1, AKT1, CSK, UNC13B, PDGFRA, ABCC1, CASR, CXADR, F10, HTR1F, EGF, PAWR, CEACAM1, TYROBP, DLG4, ITGA5, CALM1, SGK1, MET, F2RL2, CFTR	98	4121	18224	1.85012	0.00577977	0.00144911	0.00137203
GOTERM_CC_DIRECT	protein complex	11	11.2245	6.82e-05	HDAC4, PDGFRA, HDAC2, CXADR, PARD6A, CPS1, CANX, AKT1, NOS1, CFTR, MAPK3	98	412	18224	4.96493	0.012749	0.0025661	0.0024296
GOTERM_CC_DIRECT	integral component of plasma membrane	20	20.4082	0.000146	ACVRL1, PDGFRA, ABCC1, CASR, CXADR, HTR1F, SLC22A1, HTR2B, TGFA, HTR4, CRHR1, CRHR2, EDNRA, CEACAM1, KLRK1, TYROBP, HRH2, P2RY1, MET, F2RL2	98	1415	18224	2.6284	0.0270838	0.00457589	0.00433249
GOTERM_CC_DIRECT	extracellular exosome	4	4.08163	0.000209	NPAS4, MECP2, AKT1, GHRL	98	22	18224	33.8108	0.0385649	0.00560246	0.00530446
GOTERM_CC_DIRECT	extracellular space	19	19.3878	0.000238	ANGPT4, CXADR, EGF, GSTP1, PROS1, WNT8B, PRKAG2, TGFA, ADM, AFP, PRKAG3, BMP6, MECP2, COL1A1, VTN, MTHFD2, PLAU, TIMP3, GHRL	98	1347	18224	2.62303	0.0438352	0.00560246	0.00530446
GOTERM_CC_DIRECT	cell-cell junction	7	7.14286	0.000315	CEACAM1, CXADR, WDR1, CTNND1, AKT1, CSK, ITGA5	98	172	18224	7.56811	0.0574799	0.00657652	0.00622671
GOTERM_CC_DIRECT	basement membrane	7	7.14286	0.000401	ABCC1, CXADR, DLG4, P2RY1, SLC22A1, TGFA, CFTR	98	180	18224	7.23175	0.072685	0.00754468	0.00714337
GOTERM_CC_DIRECT	cell junction	11	11.2245	0.000617	ACVRL1, CEACAM1, KLRK1, CXADR, TYROBP, PLAU, P2RY1, TGFA, ITGA5, MET, CFTR	98	542	18224	3.77408	0.109535	0.0105432	0.0099824
GOTERM_CC_DIRECT	neuromuscular junction	8	8.16327	0.00102596	COL1A1, FBN3, VTN, COL4A2, VWF, CANX, TIMP3, THBS2	98	296	18224	5.02592	0.175502	0.0160734	0.0152185
GOTERM_CC_DIRECT	cytoplasm	40	42.8571	0.00277939	HDAC4, SMG1, HDAC2, PRKAA2, WDR1, GSTP1, CTNND1, HTR2B, ADM, AFP, HTR4, AKAP12, MT2A, CCNB1, DACH1, PARD6A, PNP, AKT1, CSK, NOS1, NEFH, UNC13B, NQO1, PDGFRA, EGR1, RRM2, CXADR, NOS2, CYP4A11, VASH2, PLA2G4A, PAWR, ARNT, ACSL4, MAPK14, BMP6, NR4A2, DLG4, DDIT3, CALM1, SGK1, CFTR	98	5222	18224	1.49565	0.40741	0.0401942	0.0380562
GOTERM_CC_DIRECT	alphav-beta3 integrin-vitronectin complex	2	2.04082	0.015884	VTN, ITGA5	98	3	18224	123.973	0.950716	0.191471	0.181286
GOTERM_CC_DIRECT	synapse	5	5.10204	0.0159486	DLG4, HTR2B, MTHFR, NOS1, ITGA5	98	181	18224	5.13699	0.95132	0.191471	0.181286
GOTERM_CC_DIRECT	dendritic spine	4	4.08163	0.0162954	DLG4, CANX, CTNND1, NOS1	98	100	18224	7.43837	0.954442	0.191471	0.181286
GOTERM_CC_DIRECT	endoplasmic reticulum lumen	5	5.10204	0.0193646	COL1A1, COL4A2, F10, CANX, GHRL	98	192	18224	4.84269	0.974682	0.21415	0.202759
GOTERM_CC_DIRECT	platelet alpha granule lumen	3	3.06122	0.0346899	VWF, EGF, PROS1	98	55	18224	10.1432	0.99869	0.337128	0.319196
GOTERM_CC_DIRECT	cell body	3	3.06122	0.0346899	UNC13B, HDAC4, CXADR	98	55	18224	10.1432	0.99869	0.337128	0.319196
GOTERM_CC_DIRECT	basolateral plasma membrane	7	7.14286	0.0358647	UNC13B, CEACAM1, CXADR, PARD6A, CHRNA5, DLG4, HTR2B	98	459	18224	2.83598	0.998958	0.337128	0.319196

## Sheet: GO_MF
Category		Count	%	PValue	Genes	List Total	Pop Hits	Pop Total	Fold Enrichment	Bonferroni	Benjamini	FDR
GOTERM_MF_DIRECT	AMP-activated protein kinase activity	4	4.08163	6.14e-06	PRKAA2, PRKAG2, PRKAB1, PRKAG3	97	7	16881	99.4462	0.00205956	0.00144004	0.00141004
GOTERM_MF_DIRECT	protein binding	72	73.4694	8.57e-06	ACVRL1, SMG1, CTNND1, ADM, MECP2, AKAP12, MT2A, EDNRA, DACH1, PLAU, TIMP3, AKT1, NOS1, UNC13B, PDGFRA, CASR, CXADR, VWF, ARNT, PAWR, PRKAB1, NPAS4, CEACAM1, TYROBP, COL4A2, SOAT1, DDIT3, CANX, SGK3, ITGA5, SGK1, MET, CFTR, HDAC4, KHDRBS1, HDAC2, PRKAA2, CHRNA5, GSTP1, SLC22A1, TGFA, AFP, THBS2, GABARAP, CRHR1, CRHR2, VTN, MAPK8, CCNB1, KLRK1, PARD6A, P2RY1, NKX2-1, CSK, TNNI3, MAPK3, EGR1, NQO1, …	97	8785	16881	1.42632	0.00287594	0.00144004	0.00141004
GOTERM_MF_DIRECT	platelet-derived growth factor binding	9	9.18367	6.91e-05	MAPK8, PRKAA2, PLAU, PRKAG2, AKT1, CSK, CALM1, PRKAG3, MAPK3	97	241	16881	6.49908	0.022954	0.00774026	0.00757901
GOTERM_MF_DIRECT	protein kinase binding	10	10.2041	0.000289	ACVRL1, HDAC4, CCNB1, CTNND1, PRKAG2, TNNI3, CALM1, NEFH, PRKAB1, PRKAG3	97	376	16881	4.62848	0.0924395	0.0242452	0.0237401
GOTERM_MF_DIRECT	protein phosphatase binding	5	5.10204	0.000453	CEACAM1, DLG4, CSK, MAPK14, MET	97	63	16881	13.812	0.141079	0.0304087	0.0297752
GOTERM_MF_DIRECT	protein serine/threonine kinase activity	9	9.18367	0.00135539	ACVRL1, SMG1, MAPK8, PRKAA2, AKT1, SGK3, MAPK14, SGK1, MAPK3	97	376	16881	4.16563	0.366009	0.0671079	0.0657099
GOTERM_MF_DIRECT	chloride channel regulator activity	3	3.06122	0.00139808	SGK3, SGK1, CFTR	97	10	16881	52.2093	0.37505	0.0671079	0.0657099
GOTERM_MF_DIRECT	vascular endothelial growth factor-activated receptor activity	19	19.3878	0.00174683	ACVRL1, PDGFRA, SMG1, ABCC1, PRKAA2, PRKAG2, ACSL4, MAPK14, PRKAG3, MAPK8, CPS1, P2RY1, AKT1, CSK, SGK3, SGK1, MET, CFTR, MAPK3	97	1495	16881	2.21176	0.444257	0.0733669	0.0718384
GOTERM_MF_DIRECT	scaffold protein binding	4	4.08163	0.00256116	DLG4, P2RY1, NOS1, MAPK3	97	48	16881	14.5026	0.577537	0.0935977	0.0916478
GOTERM_MF_DIRECT	MAP kinase activity	3	3.06122	0.00278565	MAPK8, MAPK14, MAPK3	97	14	16881	37.2923	0.608309	0.0935977	0.0916478
GOTERM_MF_DIRECT	protein kinase activity	8	8.16327	0.00438272	PDGFRA, SMG1, PRKAA2, AKT1, SGK3, MAPK14, MET, PRKAB1	97	359	16881	3.87813	0.771411	0.133872	0.131083
GOTERM_MF_DIRECT	drug binding	4	4.08163	0.00928524	MT2A, PNP, GSTP1, HTR2B	97	76	16881	9.15952	0.956475	0.248638	0.243458
GOTERM_MF_DIRECT	phosphatidylinositol phospholipase C activity	3	3.06122	0.0102412	EDNRA, CASR, F2RL2	97	27	16881	19.3368	0.968532	0.248638	0.243458
GOTERM_MF_DIRECT	G-protein coupled serotonin receptor activity	3	3.06122	0.0109885	HTR1F, HTR2B, HTR4	97	28	16881	18.6462	0.975585	0.248638	0.243458
GOTERM_MF_DIRECT	protein serine/threonine/tyrosine kinase activity	3	3.06122	0.0117591	PRKAA2, AKT1, SGK1	97	29	16881	18.0032	0.981211	0.248638	0.243458
GOTERM_MF_DIRECT	enzyme binding	7	7.14286	0.0118399	HDAC2, MAPK8, NKX2-1, PAWR, AKT1, MAPK14, CFTR	97	333	16881	3.65831	0.98172	0.248638	0.243458
GOTERM_MF_DIRECT	epidermal growth factor receptor binding	3	3.06122	0.0133693	EGF, TGFA, ITGA5	97	31	16881	16.8417	0.989137	0.259098	0.2537
GOTERM_MF_DIRECT	sodium channel regulator activity	3	3.06122	0.0142083	SGK3, NOS1, SGK1	97	32	16881	16.3154	0.991838	0.259098	0.2537
GOTERM_MF_DIRECT	receptor binding	7	7.14286	0.0153994	CXADR, TYROBP, DAO, NOS2, CTNND1, ADM, CSK	97	353	16881	3.45104	0.994563	0.259098	0.2537
GOTERM_MF_DIRECT	NADP binding	3	3.06122	0.0168576	NOS2, MTHFR, NOS1	97	35	16881	14.9169	0.996695	0.259098	0.2537

## Sheet: KEGG
Category	Term	Count	%	PValue	Genes	List Total	Pop Hits	Pop Total	Fold Enrichment	Bonferroni	Benjamini	FDR
KEGG_PATHWAY	MAPK signaling pathway	13	13.2653	3.07e-08	PRKAA2, EGF, PRKAG2, MAPK14, PRKAB1, PRKAG3, GABARAP, CCNB1, MAPK8, AKT1, SGK3, SGK1, MAPK3	80	134	6879	8.34207	5.64e-06	5.64e-06	4.41e-06
KEGG_PATHWAY	Focal adhesion	12	12.2449	2.02e-05	COL1A1, PDGFRA, VTN, MAPK8, COL4A2, VWF, EGF, AKT1, ITGA5, THBS2, MET, MAPK3	80	206	6879	5.00898	0.00370151	0.00185417	0.00145109
KEGG_PATHWAY	PI3K-Akt signaling pathway	15	15.3061	3.11e-05	PDGFRA, ANGPT4, PRKAA2, VWF, EGF, THBS2, COL1A1, VTN, COL4A2, AKT1, SGK3, ITGA5, SGK1, MET, MAPK3	80	345	6879	3.73859	0.00571247	0.00190959	0.00149446
KEGG_PATHWAY	Rap1 signaling pathway	11	11.2245	0.00013	ANGPT4, PDGFRA, PARD6A, EGF, P2RY1, CTNND1, AKT1, CALM1, MAPK14, MET, MAPK3	80	210	6879	4.50411	0.0235993	0.00509338	0.00398612
KEGG_PATHWAY	HIF-1 signaling pathway	7	7.14286	0.000138	MAPK8, PRKAA2, PRKAG2, AKT1, ACSL4, PRKAB1, PRKAG3	80	70	6879	8.59875	0.0251471	0.00509338	0.00398612
KEGG_PATHWAY	cAMP signaling pathway	10	10.2041	0.000407	EDNRA, MAPK8, HTR1F, AKT1, TNNI3, GHRL, HTR4, CALM1, CFTR, MAPK3	80	198	6879	4.3428	0.0721906	0.0124613	0.00975234
KEGG_PATHWAY	Pathways in cancer	14	14.2857	0.000474	PDGFRA, HDAC2, NOS2, EGF, GSTP1, ARNT, WNT8B, TGFA, EDNRA, MAPK8, COL4A2, AKT1, MET, MAPK3	80	393	6879	3.06317	0.083552	0.0124613	0.00975234
KEGG_PATHWAY	HIF-1 signaling pathway	6	6.12245	0.000848	PDGFRA, EGF, TGFA, AKT1, CALM1, MAPK3	80	65	6879	7.93731	0.144485	0.0185732	0.0145355
KEGG_PATHWAY	Insulin signaling pathway	8	8.16327	0.000977	MAPK8, PRKAA2, PRKAG2, AKT1, CALM1, PRKAB1, PRKAG3, MAPK3	80	138	6879	4.98478	0.164636	0.0185732	0.0145355
KEGG_PATHWAY	VEGF signaling pathway	7	7.14286	0.00100941	PDGFRA, MAPK8, EGF, SLC22A1, PLA2G4A, AKT1, MAPK3	80	101	6879	5.95953	0.169582	0.0185732	0.0145355
KEGG_PATHWAY	Neuroactive ligand-receptor interaction	11	11.2245	0.00117371	EDNRA, CHRNA5, HRH2, HTR1F, ADORA3, P2RY1, HTR2B, HTR4, CRHR1, F2RL2, CRHR2	80	277	6879	3.41467	0.194336	0.0196329	0.0153649
KEGG_PATHWAY	Pertussis	6	6.12245	0.00162021	MAPK8, NOS2, ITGA5, CALM1, MAPK14, MAPK3	80	75	6879	6.879	0.257966	0.0248432	0.0194425
KEGG_PATHWAY	Hypertrophic cardiomyopathy (HCM)	6	6.12245	0.00192951	PRKAA2, PRKAG2, TNNI3, ITGA5, PRKAB1, PRKAG3	80	78	6879	6.61442	0.299088	0.0259411	0.0203017
KEGG_PATHWAY	Proteoglycans in cancer	9	9.18367	0.00197378	VTN, PLAU, TIMP3, WNT8B, AKT1, ITGA5, MAPK14, MET, MAPK3	80	200	6879	3.86944	0.304785	0.0259411	0.0203017
KEGG_PATHWAY	ECM-receptor interaction	6	6.12245	0.00311715	COL1A1, VTN, COL4A2, VWF, ITGA5, THBS2	80	87	6879	5.93017	0.436987	0.0382371	0.0299247
KEGG_PATHWAY	Platelet activation	7	7.14286	0.00365268	COL1A1, VWF, P2RY1, PLA2G4A, AKT1, MAPK14, MAPK3	80	130	6879	4.6301	0.489989	0.0420058	0.0328741
KEGG_PATHWAY	Ras signaling pathway	9	9.18367	0.00419897	ANGPT4, PDGFRA, MAPK8, EGF, PLA2G4A, AKT1, CALM1, MET, MAPK3	80	226	6879	3.42428	0.538945	0.0439538	0.0343986
KEGG_PATHWAY	Calcium signaling pathway	8	8.16327	0.00429983	PDGFRA, EDNRA, NOS2, HRH2, HTR2B, NOS1, HTR4, CALM1	80	179	6879	3.84302	0.547458	0.0439538	0.0343986
KEGG_PATHWAY	MAPK signaling pathway	7	6.12245	0.00476021	ANGPT4, NOS2, EGF, ARNT, AKT1, MAPK3	80	96	6879	5.37422	0.584374	0.0460989	0.0360774
KEGG_PATHWAY	Circadian rhythm	4	4.08163	0.00519938	PRKAA2, PRKAG2, PRKAB1, PRKAG3	80	31	6879	11.0952	0.616794	0.0475221	0.0371912

## Sheet: angiogenesis related targets
A2M
AAAS
AAMP
AAVS1
ABCA4
ABCB1
ABCB7
ABCB8
ABCC1
ABCC4
ABCC6
ABCC8
ABCG2
ABL1
ABL2
ABO
ACACA
ACAD10
ACAN
ACE
ACE2
ACHE
ACKR1
ACKR2
ACKR3
ACKR4
ACP1
ACP3
ACR
ACSL4
ACSM5
ACTA1
ACTA2
ACTB
ACTC1
ACTG1
ACTG2
ACTN1
ACTN2
ACTN4
ACTR3
ACVR1
ACVR1B
ACVR2A
ACVR2B
ACVRL1
ADA
ADA2
ADAM10
ADAM12
ADAM15
ADAM17
ADAM2
ADAM28
ADAM33
ADAM3B
ADAM8
ADAM9
ADAMTS1
ADAMTS10
ADAMTS12
ADAMTS13
ADAMTS14
ADAMTS15
ADAMTS18
ADAMTS2
ADAMTS3
ADAMTS4
ADAMTS5
ADAMTS6
ADAMTS7
ADAMTS8
ADAMTS9
ADAMTS9-AS2
ADAMTSL1
ADAMTSL4
ADAR
ADCY10
ADCY6
ADCYAP1
ADD1
ADD3
ADGRA2
ADGRA3
ADGRB1
ADGRB2
ADGRB3
ADGRD1
ADGRE2
ADGRE5
ADGRG1
ADGRG6
ADGRL4
ADIPOQ
ADIPOR1
ADIPOR2
ADK
ADM
ADM2
ADORA1
ADORA2A
ADORA2B
ADORA3
ADPRH
ADRA1D
ADRB1
ADRB2
ADRB3
ADTRP
AEBP1
AFDN
AFP
AGER
AGGF1
AGK
AGO1
AGO2
AGPS
AGR2
AGRN
AGRP
AGT
AGTR1
AGTR2
AGTRAP
AGXT2
AHCY
AHR
AHSA1
AHSG
AIF1
AIFM1
AIM2
AIMP1
AIMP2
AIRE
AKAP1
AKAP12
AKIP1
AKIRIN2
AKR1B1
AKT1
AKT1S1
AKT2
AKT3
ALAS1
ALB
ALCAM
ALDH1A1
ALDH2
ALDH9A1
ALDOA
ALK
ALKBH1
ALKBH3
ALKBH5
ALKBH8
ALMS1
ALOX12
ALOX15
ALOX15B
ALOX5
ALPP
AMBP
AMD1
AMFR
AMHR2
AMIGO1
AMIGO2
AMOT
AMOTL1
AMOTL2
ANG
ANGPT1
ANGPT2
ANGPT4
ANGPTL1
ANGPTL2
ANGPTL3
ANGPTL4
ANGPTL5
ANGPTL6
ANGPTL7
ANGPTL8
ANKFY1
ANKH
ANKRD1
ANKRD2
ANKRD23
ANKRD36B
ANKRD40
ANKZF1
ANLN
ANO1
ANO9
ANP32E
ANPEP
ANTXR1
ANTXR2
ANXA1
ANXA10
ANXA11
ANXA2
ANXA2R
ANXA3
ANXA4
ANXA5
ANXA6
ANXA7
ANXA8
ANXA9
AOC3
AOX1
APAF1
APBB1IP
APC
APCS
APELA
APEX1
APLN
APLNR
APOA1
APOB
APOBEC3A
APOC1
APOD
APOE
APOH
APOL1
APOL3
APOLD1
APOM
APP
APRT
AQP1
AQP3
AQP4
AQP5
AQP7
AQP9
AR
ARC
AREG
ARF1
ARF4
ARF6
ARFGEF1
ARFGEF2
ARG1
ARG2
ARHGAP1
ARHGAP17
ARHGAP18
ARHGAP22
ARHGAP24
ARHGAP35
ARHGAP4
ARHGAP5
ARHGDIA
ARHGDIB
ARHGEF10L
ARHGEF11
ARHGEF12
ARHGEF15
ARHGEF17
ARHGEF18
ARHGEF2
ARHGEF4
ARHGEF7
ARL3
ARL6IP5
ARMS2
ARNT
ARNT2
ARNTL
ARPC2
ARPC3
ARRB1
ARRB2
ART1
ARTN
ASAH1
ASAP1
ASH2L
ASIC5
ASPH
ASPN
ASPSCR1
ASRGL1
ASS1
ATAD2
ATE1
ATF1
ATF2
ATF3
ATF4
ATG16L1
ATG4A
ATG7
ATIC
ATM
ATN1
ATOH8
ATOX1
ATP1A1
ATP1B3
ATP2A2
ATP2B4
ATP5F1A
ATP5F1B
ATP5IF1
ATP5MF
ATP5PO
ATP6AP2
ATP6V0A2
ATP6V0C
ATP7A
ATP7B
ATR
ATXN2
ATXN7L2
AURKA
AURKB
AVEN
AXIN1
AXL
AZIN2
AZU1
B2M
B3GAT1
B3GLCT
B4GALNT1
B4GALT1
B4GALT6
BACH1
BAD
BAG1
BAG3
BAIAP2
BAIAP2L1
BAIAP2L2
BAIAP3
BAK1
BAMBI
BANP
BARD1
BATF2
BAX
BBC3
BCAR1
BCAR3
BCAS3
BCAT1
BCL10
BCL2
BCL2L1
BCL2L10
BCL2L11
BCL2L12
BCL2L15
BCL2L2
BCL3
BCL6
BCL6B
BCL9
BCLAF1
BCR
BDKRB1
BDKRB2
BDNF
BECN1
BEST1
BEX2
BGLAP
BGN
BHLHE40
BHLHE41
BHMT
BICD1
BID
BIK
BIRC2
BIRC3
BIRC5
BIRC6
BLM
BLVRB
BLZF1
BMI1
BMP1
BMP10
BMP2
BMP3
BMP4
BMP6
BMP7
BMPER
BMPR1A
BMPR1B
BMPR2
BMX
BNIP3
BNIP3L
BNIPL
BOK
BOP1
BPI
BPIFB4
BRAF
BRCA1
BRCA2
BRCA3
BRCC3
BRD2
BRD4
BRD7
BRF2
BRMS1
BRS3
BSG
BTBD7
BTC
BTG1
BTG3
BTK
BTRC
BUB1B
C10orf88
C11orf58
C16orf95
C1D
C1GALT1
C1QA
C1QL3
C1QTNF3
C1QTNF6
C2
C2-AS1
C3
C3AR1
C4A
C4BPA
C4BPB
C5
C5AR1
C6
C6orf223
C7
C8B
C9
CA12
CA2
CA9
CACNA1C
CACNA2D2
CACNB2
CADM1
CADM2
CADM4
CAGE1
CALB2
CALCA
CALCOCO1
CALCR
CALCRL
CALD1
CALM1
CALR
CAMK1
CAMK2G
CAMKK2
CAMP
CAMTA1
CANT1
CANX
CAPN1
CAPN13
CAPN2
CAPN3
CAPN5
CAPN6
CAPNS1
CAPRIN1
CAPZA1
CAPZB
CARD10
CARTPT
CASC2
CASP1
CASP10
CASP14
CASP2
CASP3
CASP4
CASP5
CASP7
CASP8
CASP9
CASR
CAST
CAT
CAV1
CAV2
CAV3
CAVIN1
CAVIN2
CBL
CBR1
CBS
CBX1
CBX3
CBX4
CBX5
CCAT2
CCBE1
CCDC134
CCDC158
CCDC34
CCDC88A
CCDC88C
CCK
CCKBR
CCL1
CCL11
CCL14
CCL15
CCL16
CCL17
CCL18
CCL19
CCL2
CCL20
CCL21
CCL22
CCL23
CCL24
CCL26
CCL27
CCL28
CCL3
CCL4
CCL5
CCL7
CCL8
CCM2
CCM2L
CCN1
CCN2
CCN3
CCN4
CCN5
CCN6
CCNA1
CCNA2
CCNB1
CCNC
CCND1
CCND2
CCND3
CCNE1
CCNE2
CCNF
CCNG1
CCNG2
CCNH
CCNI
CCNK
CCNY
CCR1
CCR10
CCR2
CCR3
CCR4
CCR5
CCR6
CCR7
CCR8
CCS
CCT2
CCT3
CCT4
CCT5
CCT6A
CCT7
CCT8
CD109
CD14
CD151
CD160
CD163
CD177
CD19
CD1B
CD200
CD200R1
CD209
CD24
CD248
CD274
CD276
CD28
CD2AP
CD34
CD36
CD38
CD3G
CD4
CD40
CD40LG
CD44
CD47
CD52
CD55
CD6
CD63
CD68
CD74
CD79A
CD80
CD81
CD82
CD86
CD8A
CD9
CD93
CDA
CDC25A
CDC25B
CDC25C
CDC27
CDC34
CDC42
CDC42EP1
CDC42EP2
CDC42EP3
CDC42EP4
CDC42EP5
CDC6
CDCA5
CDCA8
CDH1
CDH10
CDH11
CDH12
CDH13
CDH15
CDH17
CDH19
CDH2
CDH4
CDH5
CDH9
CDIPT
CDK1
CDK11B
CDK16
CDK2
CDK20
CDK2AP1
CDK4
CDK5
CDK5R1
CDK5RAP3
CDK6
CDK8
CDK9
CDKN1A
CDKN1B
CDKN2A
CDKN2B
CDKN2B-AS1
CDKN2D
CDKN3
CDX2
CEACAM1
CEACAM3
CEACAM5
CEACAM6
CEACAM8
CEBPA
CEBPB
CEBPD
CEBPZ
CEL
CELA1
CELSR1
CEMIP2
CENPU
CEP112
CEP41
CEP55
CEPT1
CERS2
CES2
CETP
CFB
CFH
CFI
CFL1
CFLAR
CFP
CFTR
CGA
CGB3
CGB5
CGB7
CGNL1
CHAT
CHCHD4
CHD3
CHEK1
CHEK2
CHFR
CHGA
CHI3L1
CHI3L2
CHID1
CHKA
CHMP4A
CHP1
CHRD
CHRDL1
CHRDL2
CHRM1
CHRNA1
CHRNA4
CHRNA5
CHRNA7
CHRNB2
CHST3
CHUK
CIAPIN1
CIB1
CIDEC
CIITA
CIP2A
CISH
CITED2
CITED4
CKAP4
CKAP5
CKS1B
CLCA2
CLCF1
CLCN3
CLCN4
CLDN1
CLDN10
CLDN11
CLDN19
CLDN3
CLDN4
CLDN5
CLDN6
CLDN7
CLEC11A
CLEC12A
CLEC14A
CLEC16A
CLEC3B
CLEC4A
CLIC1
CLIC2
CLIC3
CLIC4
CLIP1
CLK1
CLOCK
CLPP
CLTC
CLU
CMA1
CMC2
CMIP
CMKLR1
CMKLR2
CMTM3
CMTM4
CNKSR1
CNMD
CNN1
CNN3
CNOT2
CNPY2
CNR1
CNR2
CNTN1
CNTN2
COL10A1
COL11A1
COL11A2
COL12A1
COL13A1
COL14A1
COL15A1
COL16A1
COL17A1
COL18A1
COL19A1
COL1A1
COL1A2
COL20A1
COL21A1
COL22A1
COL23A1
COL24A1
COL25A1
COL27A1
COL2A1
COL3A1
COL4A1
COL4A2
COL4A3
COL4A4
COL4A5
COL4A6
COL5A1
COL5A2
COL5A3
COL6A1
COL6A2
COL6A3
COL7A1
COL8A1
COL8A2
COL9A1
COL9A2
COL9A3
COLGALT1
COMMD1
COMP
COMT
COPS3
COPS5
COPS7A
COPS8
CORT
COTL1
COX4I2
COX5A
CP
CPA6
CPB1
CPB2
CPD
CPEB1
CPEB4
CPM
CPN1
CPOX
CPQ
CPS1
CPS1-IT1
CRABP1
CRABP2
CRAT
CRBN
CREB1
CREB3L1
CREB5
CREBBP
CREBRF
CREBZF
CREG1
CREM
CRH
CRHR1
CRHR2
CRIM1
CRIP2
CRIPT
CRK
CRNDE
CRP
CRTAP
CRYAA
CRYAB
CSDC2
CSDE1
CSF1
CSF1R
CSF2
CSF2RA
CSF2RB
CSF3
CSF3R
CSH1
CSH2
CSHL1
CSK
CSN1S1
CSNK1A1
CSNK1D
CSNK1G1
CSNK2A1
CSNK2A2
CSNK2B
CSPG4
CST3
CST4
CST9
CSTA
CTBP1
CTBP2
CTCF
CTD
CTF1
CTH
CTHRC1
CTLA4
CTNNA1
CTNNAL1
CTNNB1
CTNNBIP1
CTNND1
CTNND2
CTRL
CTSB
CTSC
CTSD
CTSE
CTSF
CTSG
CTSH
CTSK
CTSL
CTSS
CTSV
CTTN
CUL1
CUL2
CUL3
CUL4A
CUL4B
CUL5
CUX1
CX3CL1
CX3CR1
CXADR
CXCL1
CXCL10
CXCL11
CXCL12
CXCL13
CXCL14
CXCL16
CXCL17
CXCL2
CXCL3
CXCL5
CXCL6
CXCL8
CXCL9
CXCR1
CXCR2
CXCR3
CXCR4
CXCR5
CXCR6
CYB561D1
CYBA
CYBB
CYCS
CYLD
CYP11B1
CYP11B2
CYP19A1
CYP1A1
CYP1A2
CYP1B1
CYP24A1
CYP26B1
CYP27A1
CYP27B1
CYP2C19
CYP2C8
CYP2C9
CYP2D6
CYP2J2
CYP2S1
CYP3A4
CYP3A5
CYP3A7
CYP4A11
CYP4B1
CYP4F2
CYP4V2
CYP4Z1
CYP4Z2P
CYP51A1
CYSLTR2
CYTH2
CYTOR
DAAM1
DAB2
DAB2IP
DACH1
DACH2
DAG1
DANCR
DAND5
DAO
DAPK1
DAXX
DBN1
DCBLD2
DCC
DCD
DCK
DCLK1
DCN
DCP1B
DCP2
DCT
DCTN1
DCUN1D1
DCX
DDA1
DDAH1
DDAH2
DDB1
DDB2
DDC
DDIT3
DDOST
DDR1
DDR2
DDT
DDX1
DDX10
DDX17
DDX39B
DDX3X
DDX3Y
DDX47
DDX5
DDX58
DEFA1
DEFA3
DEFA5
DEFA6
DEFB103A
DEFB103B
DEFB4A
DEGS1
DEK
DELEC1
DEPDC1
DEPP1
DEPTOR
DES
DESI2
DFFB
DGKA
DGKE
DGKQ
DHFR
DHH
DHX32
DHX33
DHX36
DHX9
DIABLO
DIAPH1
DICER1
DIRAS3
DKC1
DKK1
DKK2
DKK3
DKK4
DLC1
DLEU1
DLG1
DLG3
DLG4
DLK1
DLL1
DLL3
DLL4
DLX4
DLX6-AS1
DMBT1
DMD
DMKN
DMP1
DMTF1
DNAH8
DNAI1
DNAJA1
DNAJA2
DNAJA3
DNAJA4
DNAJB11
DNAJB4
DNAJB9
DNAJC10
DNM1L
DNM2
DNM3
DNMT1
DNMT3A
DNMT3B
DNPH1
DNTT
DOCK1
DOCK4
DOCK7
DOK2
DOT1L
DPEP1
DPP4
DPP8
DPP9
DPT
DPYD
DPYSL2
DRD2
DROSHA
DSE
DSG1
DSG2
DSP
DST
DUOX1
DUOX2
DUSP1
DUSP10
DUSP13
DUSP16
DUSP19
DUSP2
DUSP3
DUSP4
DUSP5
DUSP6
DUX4
DUX4L9
DVL2
DVL3
DYNC1H1
DYNC1I1
DYNC1I2
DYNC1LI1
DYNC2H1
DYRK1A
DYRK2
DYSF
DZIP3
E2F1
E2F2
E2F3
E2F7
E2F8
EAF2
EBAG9
EBI3
ECE1
ECE2
ECHS1
ECM1
ECM2
ECSCR
ECT2
EDF1
EDIL3
EDN1
EDN2
EDN3
EDNRA
EDNRB
EEA1
EEF1A1
EEF1B2
EEF1G
EEF2
EEF2K
EFEMP1
EFEMP2
EFNA1
EFNA2
EFNA3
EFNA4
EFNA5
EFNB1
EFNB2
EFNB3
EFS
EFTUD2
EGF
EGFL6
EGFL7
EGFR
EGLN1
EGLN2
EGLN3
EGR1
EGR2
EGR3
EHD1
EHD3
EHD4
EHF
EHMT2
EIF1AY
EIF2AK3
EIF2AK4
EIF2B5
EIF2S1
EIF3E
EIF3I
EIF3K
EIF4A1
EIF4A2
EIF4A3
EIF4B
EIF4E
EIF4EBP1
EIF4G1
EIF5A
EIF5A2
EIF6
ELANE
ELAVL1
ELF1
ELF2
ELF3
ELF4
ELF5
ELK1
ELK3
ELMO1
ELMO2
ELMO3
ELMOD1
ELN
ELOB
ELOC
EMC10
EMCN
EMILIN1
EMILIN2
EMP1
EMP2
ENAH
ENG
ENHO
ENO1
ENO2
ENPEP
ENPP1
ENPP2
ENSG00000285000
ENTPD1
EOGT
EP300
EPAS1
EPCAM
EPGN
EPHA1
EPHA2
EPHA3
EPHA4
EPHA5
EPHA6
EPHA7
EPHA8
EPHB1
EPHB2
EPHB3
EPHB4
EPHB6
EPHX1
EPHX2
EPHX3
EPHX4
EPN1
EPN2
EPN3
EPO
EPOR
EPRS1
EPS8
EPX
EPYC
ERAP1
ERAP2
ERBB2
ERBB3
ERBB4
ERBIN
ERCC1
ERCC2
ERCC5
ERCC6L
EREG
ERG
ERN1
ERO1A
ERP44
ERRFI1
ESAM
ESM1
ESPL1
ESPN
ESR1
ESR2
ESRRA
ESRRB
ESRRG
ETS1
ETS2
ETV1
ETV2
ETV4
ETV5
ETV6
ETV7
EVR3
EWSR1
EXO1
EXT2
EYA1
EYA3
EYA4
EZH2
EZR
F10
F11
F11R
F12
F13A1
F13B
F2
F2R
F2RL1
F2RL2
F2RL3
F3
F5
F7
F8
F9
FABP1
FABP12
FABP4
FABP5
FABP7
FADD
FAIM
FAM162A
FAM215A
FAM222B
FAM3A
FAM98A
FAP
FARSA
FAS
FASLG
FASN
FASTKD3
FAT4
FBLN1
FBLN2
FBLN5
FBLN7
FBN1
FBN2
FBN3
FBP2
FBXL19-AS1
FBXO10
FBXO11
FBXO22
FBXO31
FBXO42
FBXO5
FBXO8
FBXW11
FBXW7
FBXW7-AS1
FCER2
FCGR1A
FCGR3A
FCGRT
FCN1
FCN3
FCRL2
FCRL6
FDPS
FECH
FEN1
FER
FERMT2
FERMT3
FES
FETUB
FEZF2
FFAR4
FGA
FGB
FGD5
FGF1
FGF10
FGF11
FGF13
FGF14
FGF16
FGF18
FGF19
FGF2
FGF20
FGF21
FGF22
FGF3
FGF4
FGF5
FGF6
FGF7
FGF8
FGF9
FGFBP1
FGFBP3
FGFR1
FGFR2
FGFR3
FGFR4
FGFRL1
FGG
FGL1
FGL2
FGR
FH
FHIT
FHL1
FHL2
FHL3
FIBP
FILIP1L
FIP1L1
FIS1
FJX1
FKBP1A
FKBP4
FKBP5
FKBP8
FKBPL
FLCN
FLG
FLI1
FLII
FLNA
FLNB
FLT1
FLT3
FLT3LG
FLT4
FLVCR1
FLVCR2
FMNL3
FMO1
FMO3
FMOD
FMR1
FN1
FNDC1
FNDC4
FOLH1
FOS
FOSB
FOSL1
FOXA1
FOXA2
FOXC1
FOXC2
FOXCUT
FOXD3
FOXF1
FOXG1
FOXJ2
FOXK1
FOXM1
FOXN2
FOXO1
FOXO3
FOXO4
FOXP1
FOXP2
FOXP3
FOXP4-AS1
FOXQ1
FOXR2
FPR1
FPR2
FRAS1
FRAT1
FREM1
FREM2
FRG1
FRK
FRS2
FRZB
FSCN1
FSHB
FSHR
FST
FSTL1
FSTL3
FTH1
FTMT
FTO
FUBP3
FUNDC1
FURIN
FUS
FUT1
FUT11
FUT2
FUT3
FUT5
FUT6
FUT7
FUT9
FXN
FXR1
FXR2
FYB1
FYN
FZD1
FZD10
FZD3
FZD4
FZD5
FZD6
FZD7
FZD8
FZD9
G3BP2
G6PC1
G6PD
GAB1
GAB2
GABARAP
GABARAPL1
GABPA
GABPB1
GABRE
GADD45A
GAGE12F
GAGE12I
GAL
GALK1
GALNS
GALR1
GALR2
GANAB
GAPDH
GAPLINC
GAS1
GAS5
GAS5-AS1
GAS6
GAST
GATA1
GATA2
GATA3
GATA4
GATA6
GATA6-AS1
GATM
GBP1
GC
GCA
GCG
GCH1
GCK
GCKR
GCLC
GCM1
GDE1
GDF11
GDF15
GDF2
GDF5
GDF6
GDNF
GEM
GFAP
GFPT1
GFUS
GGT1
GH1
GHR
GHRL
GHSR
GIP
GIPC1
GIT1
GJA1
GJA4
GJA5
GJB1
GJB2
GLB1
GLCE
GLG1
GLI1
GLI2
GLI3
GLIPR1
GLMN
GLO1
GLP1R
GLRX
GLS
GLUD1
GLUL
GMFB
GMFG
GNA11
GNA12
GNA13
GNA14
GNAI1
GNAI2
GNAI3
GNAL
GNAQ
GNAS
GNB1
GNB3
GNG7
GNL3
GNRH1
GNRHR
GOLGA2
GOLPH3
GP1BA
GP2
GPAA1
GPAT4
GPC1
GPD1
GPER1
GPI
GPLD1
GPNMB
GPR15
GPR151
GPR182
GPR37L1
GPR39
GPR4
GPR55
GPR87
GPRC6A
GPSM2
GPX1
GRAMD4
GRAP2
GRAPL
GRB10
GRB2
GRB7
GREM1
GRHL2
GRIN1
GRIN2A
GRIN2B
GRIN2C
GRIN2D
GRK1
GRK2
GRK3
GRK4
GRK5
GRK6
GRM1
GRM8
GRN
GRP
GRPR
GRWD1
GSK3A
GSK3B
GSR
GSS
GSTM1
GSTM2
GSTO1
GSTP1
GSTT1
GSTT2B
GTF2I
GTF2IRD1
GTF3A
GUCY1A1
GUCY1B1
GUK1
GZMB
H1-0
H1-2
H1-3
H1-5
H19
H2AC18
H2AX
H2AZ1
H2BC1
H2BC10
H2BC11
H2BC12
H2BC13
H2BC14
H2BC15
H2BC17
H2BC18
H2BC21
H2BC3
H2BC4
H2BC5
H2BC6
H2BC7
H2BC8
H2BC9
H2BS1
H2BU1
H3-3A
H3-3B
H3C1
H3C10
H3C11
H3C12
H3C13
H3C14
H3C15
H3C2
H3C3
H3C4
H3C6
H3C7
H3C8
H4-16
H4C1
H4C11
H4C12
H4C13
H4C14
H4C15
H4C2
H4C3
H4C4
H4C5
H4C6
H4C8
H4C9
HABP2
HADHA
HADHB
HAGLR
HAND1
HAND2
HAND2-AS1
HAPLN1
HAPLN2
HAPLN3
HAPLN4
HAS1
HAS2
HAS3
HASPIN
HAVCR1
HAVCR2
HAX1
HBB
HBEGF
HCAR1
HCG11
HCK
HCRT
HDAC1
HDAC10
HDAC11
HDAC2
HDAC3
HDAC4
HDAC5
HDAC6
HDAC7
HDAC9
HDC
HDGF
HEBP1
HECW2
HEG1
HEMGN
HEPH
HEPN1
HERC2
HERPUD1
HERV.E-PTN
HES1
HES6
HEXIM1
HEY1
HEY2
HFE
HFE-AS1
HGD
HGF
HGFAC
HGS
HHEX
HHIP
HHIPL1
HHIPL2
HHT4
HIC1
HIF1A
HIF1A-AS2
HIF1AN
HIF3A
HILPDA
HIPK1
HIPK2
HIPK3
HIVEP3
HJV
HK1
HK2
HLA-A
HLA-DPB1
HLA-DQB1
HLA-E
HLA-G
HLA-S
HLF
HMGA1
HMGA2
HMGB1
HMGB2
HMGCR
HMGCS2
HMMR
HMOX1
HNF1A
HNF1A-AS1
HNF4A
HNRNPA1
HNRNPA2B1
HNRNPA3
HNRNPAB
HNRNPC
HNRNPD
HNRNPDL
HNRNPH1
HNRNPH2
HNRNPK
HNRNPL
HNRNPLL
HNRNPM
HNRNPR
HNRNPU
HOPX
HOTAIR
HOXA11-AS
HOXA13
HOXA3
HOXA5
HOXA7
HOXA9
HOXB13
HOXB2
HOXB3
HOXB5
HOXB7
HOXB9
HOXC10
HOXC6
HOXD1
HOXD10
HOXD3
HP
HPGD
HPGDS
HPN
HPSE
HPSE2
HPX
HRAS
HRG
HRH1
HRH2
HRNR
HS3ST3B1
HS6ST1
HS6ST2
HS6ST3
HSD11B1
HSD11B2
HSD3B1
HSF2
HSF4
HSP90AA1
HSP90AA2P
HSP90AB1
HSP90B1
HSPA12A
HSPA12B
HSPA14
HSPA1A
HSPA1B
HSPA2
HSPA4
HSPA5
HSPA8
HSPA9
HSPB1
HSPB2
HSPB6
HSPD1
HSPG2
HTATIP2
HTN1
HTR1B
HTR1F
HTR2B
HTR4
HTRA1
HULC
HYAL1
HYAL2
HYAL3
HYOU1
IAPP
IBSP
ICAM1
ICAM2
ICAM3
ICOSLG
ID1
ID2
ID3
ID4
IDE
IDH1
IDH2
IDH3A
IDO1
IER2
IER3
IFI16
IFI27
IFITM1
IFN1@
IFNA1
IFNA2
IFNAR1
IFNAR2
IFNB1
IFNG
IFNGR1
IFNGR2
IFT172
IGBP1
IGF1
IGF1R
IGF2
IGF2BP1
IGF2BP2
IGF2BP3
IGF2R
IGFBP1
IGFBP2
IGFBP3
IGFBP4
IGFBP5
IGFBP6
IGFBP7
IGHA1
IGHE
IGKC
IGKV3-20
IHH
IKBKB
IKBKE
IKBKG
IKZF1
IKZF2
IKZF3
IL10
IL11
IL12A
IL12B
IL12RB1
IL12RB2
IL13
IL13RA1
IL13RA2
IL15
[truncated: 2,515 more rows]

## Sheet:  intersected targets
ARNT
PLAU
NOS2
ANGPT4
NRP2
TIMP3
VWF
ADM
MET
EGF
THBS2
TGFA
ITGA5
CEACAM1
PDGFRA
VTN
BMP6
COL4A2
MAPK14
ACVRL1
CFTR
DACH1
CYP4A11
SLC22A1
MECP2
CASR
NKX2-1
ACSL4
CPS1
CRHR1
COL1A1
AKAP12
AKT1
SGK3
UNC13B
WDR1
MT2A
NPAS4
DDIT3
GSTP1
TNNI3
EGR1
NR4A2
DAO
TYROBP
HDAC4
NOS1
CANX
PAWR
GABARAP
INHBA
CHRNA5
P2RY1
GHRL
CCNB1
HDAC2
NEFH
PLA2G4A
AFP
CXADR
SGK1
CALM1
CRHR2
DLG4
KLRK1
HTR4
PROS1
ADORA3
MTHFD2
NQO1
ABCC1
MTHFR
F10
PRKAB1
PRKAG2
RRM2
EDNRA
PRKAG3
PNP
PRKAA2
KHDRBS1
CSK
F2RL2
PARD6A
HRH2
HTR1F
SOAT1
HTR2B
MAPK3
MAPK8
SMG1
CTNND1
VASH2
FBN3
RBM20
CEPT1
WNT8B
NT5DC1

## Sheet: string_interactions.tsv default
SUID	AverageShortestPathLength	BetweennessCentrality	ClosenessCentrality	ClusteringCoefficient	Degree	Eccentricity	IsSingleNode	name	NeighborhoodConnectivity	NumberOfDirectedEdges	NumberOfUndirectedEdges	PartnerOfMultiEdgedNodePairs	Radiality	selected	SelfLoops	shared name	Stress	TopologicalCoefficient
72	2.20455	0.0717049	0.453608	0.208791	14	5	FALSE	DLG4	11	14	0	0	0.827922	FALSE	0	DLG4	2222	0.189223
73	2.34091	0.017769	0.427184	0.52381	7	4	FALSE	NOS1	15.4286	7	0	0	0.808442	FALSE	0	NOS1	662	0.27551
76	2.36364	0.00657708	0.423077	0.583333	9	5	FALSE	PLAU	16.1111	9	0	0	0.805195	FALSE	0	PLAU	228	0.298354
77	2.42045	0.00169637	0.413146	0.678571	8	5	FALSE	VTN	17.25	8	0	0	0.797078	FALSE	0	VTN	80	0.338235
79	3.14773	0	0.31769	1	4	6	FALSE	PRKAA2	6.5	4	0	0	0.693182	FALSE	0	PRKAA2	0	0.464286
80	2.43182	0.0310408	0.411215	0.6	5	5	FALSE	PRKAB1	13.2	5	0	0	0.795455	FALSE	0	PRKAB1	590	0.265306
82	2.80682	0.0368601	0.356275	0.25	8	5	FALSE	PRKAG2	5.5	8	0	0	0.741883	FALSE	0	PRKAG2	778	0.201923
89	2.45455	0.0127538	0.407407	0.466667	6	5	FALSE	HDAC2	15.5	6	0	0	0.792208	FALSE	0	HDAC2	422	0.319444
90	2.81818	0.0102959	0.354839	0.285714	7	6	FALSE	MECP2	8.14286	7	0	0	0.74026	FALSE	0	MECP2	264	0.258065
93	3.14773	0	0.31769	1	4	6	FALSE	PRKAG3	6.5	4	0	0	0.693182	FALSE	0	PRKAG3	0	0.464286
96	2.375	0.0507996	0.421053	0.190476	7	5	FALSE	CANX	12.4286	7	0	0	0.803571	FALSE	0	CANX	956	0.236264
97	2.76136	0.0392054	0.36214	0.166667	9	6	FALSE	CFTR	6	9	0	0	0.748377	FALSE	0	CFTR	674	0.181481
100	2.42045	0.0149804	0.413146	0.285714	7	4	FALSE	GSTP1	11.7143	7	0	0	0.797078	FALSE	0	GSTP1	486	0.234286
101	2.23864	0.0148395	0.446701	0.409091	12	4	FALSE	MAPK8	13.5833	12	0	0	0.823052	FALSE	0	MAPK8	532	0.238304
106	2.35227	0.00924115	0.425121	0.619048	7	4	FALSE	CALM1	15.8571	7	0	0	0.806818	FALSE	0	CALM1	266	0.288312
107	2.35227	0.0711747	0.425121	0.5	8	4	FALSE	NOS2	14.375	8	0	0	0.806818	FALSE	0	NOS2	1712	0.271226
110	1.63636	0.468844	0.611111	0.118293	41	4	FALSE	AKT1	7.5122	41	0	0	0.909091	FALSE	0	AKT1	8530	0.0966107
111	2.52273	0.00290111	0.396396	0.333333	3	5	FALSE	ARNT	23	3	0	0	0.782468	FALSE	0	ARNT	134	0.492754
114	4.02273	0	0.248588	0	1	6	FALSE	MTHFD2	6	1	0	0	0.568182	FALSE	0	MTHFD2	0	0
115	3.03409	0.0293906	0.329588	0.2	6	5	FALSE	MTHFR	5.16667	6	0	0	0.709416	FALSE	0	MTHFR	972	0.277778
118	4.42045	0	0.226221	0	1	7	FALSE	KLRK1	2	1	0	0	0.511364	FALSE	0	KLRK1	0	0
119	3.43182	0.0227273	0.291391	0	2	6	FALSE	TYROBP	3	2	0	0	0.652597	FALSE	0	TYROBP	394	0.5
123	2.21591	0.0668972	0.451282	0.346154	13	5	FALSE	EGR1	13.1538	13	0	0	0.826299	FALSE	0	EGR1	1840	0.215637
124	1.92045	0.147946	0.52071	0.193846	26	4	FALSE	MAPK3	9.57692	26	0	0	0.868506	FALSE	0	MAPK3	3736	0.138239
128	2.48864	0.0227273	0.401826	0.6	5	5	FALSE	CCNB1	20.6	5	0	0	0.787338	FALSE	0	CCNB1	492	0.434043
129	3.47727	0	0.287582	0	1	6	FALSE	RRM2	5	1	0	0	0.646104	FALSE	0	RRM2	0	0
132	2.15909	0.0628349	0.463158	0.282051	13	4	FALSE	MAPK14	12	13	0	0	0.834416	FALSE	0	MAPK14	1582	0.196154
135	2.46591	0.0451933	0.40553	0.3	5	5	FALSE	PLA2G4A	16.4	5	0	0	0.790584	FALSE	0	PLA2G4A	794	0.333333
140	2.40909	0.00111055	0.415094	0.733333	6	5	FALSE	CTNND1	20.3333	6	0	0	0.798701	FALSE	0	CTNND1	72	0.376543
141	2.45455	0.0203229	0.407407	0.244444	10	5	FALSE	MET	10.8	10	0	0	0.792208	FALSE	0	MET	596	0.230435
144	2.04545	0.0805962	0.488889	0.241107	23	5	FALSE	EGF	10.3478	23	0	0	0.850649	FALSE	0	EGF	2404	0.156785
145	2.28409	0.0270168	0.437811	0.371795	13	5	FALSE	VWF	12.6154	13	0	0	0.816558	FALSE	0	VWF	822	0.225275
148	2.42045	0.0012561	0.413146	0.7	5	5	FALSE	DDIT3	17.2	5	0	0	0.797078	FALSE	0	DDIT3	44	0.330769
151	3.375	0	0.296296	1	2	6	FALSE	CRHR2	5	2	0	0	0.660714	FALSE	0	CRHR2	0	0.625
152	2.46591	0.0537187	0.40553	0.142857	7	5	FALSE	GHRL	11.2857	7	0	0	0.790584	FALSE	0	GHRL	1058	0.234043
159	2.39773	0.0521157	0.417062	0.345455	11	5	FALSE	ITGA5	11.7273	11	0	0	0.800325	FALSE	0	ITGA5	1192	0.24053
162	2.46591	0.00461729	0.40553	0.535714	8	5	FALSE	CSK	16	8	0	0	0.790584	FALSE	0	CSK	144	0.340426
165	3.38636	0	0.295302	0	1	6	FALSE	CEACAM1	11	1	0	0	0.659091	FALSE	0	CEACAM1	0	0
170	3.51136	0	0.28479	0	1	6	FALSE	F2RL2	3	1	0	0	0.641234	FALSE	0	F2RL2	0	0
171	2.52273	0.0227273	0.396396	0.333333	3	5	FALSE	PARD6A	18.6667	3	0	0	0.782468	FALSE	0	PARD6A	308	0.390071
174	3.44318	0.000566	0.290429	0	3	6	FALSE	ACVRL1	3	3	0	0	0.650974	FALSE	0	ACVRL1	8	0.5
175	3.22727	0.00163519	0.309859	0.333333	3	6	FALSE	INHBA	7	3	0	0	0.681818	FALSE	0	INHBA	58	0.512821
178	2.5	0.00090582	0.4	0.666667	4	5	FALSE	EDNRA	20.75	4	0	0	0.785714	FALSE	0	EDNRA	32	0.432292
185	2.71591	0.0283452	0.368201	0.1	5	6	FALSE	F10	10.2	5	0	0	0.75487	FALSE	0	F10	738	0.282353
188	3.70455	0	0.269939	0	1	7	FALSE	PROS1	5	1	0	0	0.613636	FALSE	0	PROS1	0	0
191	2.88636	0	0.346457	1	2	5	FALSE	KHDRBS1	17	2	0	0	0.730519	FALSE	0	KHDRBS1	0	0.62963
194	2.93182	0.046659	0.341085	0.1	5	6	FALSE	SGK1	6.2	5	0	0	0.724026	FALSE	0	SGK1	952	0.254545
197	2.95455	0.00191571	0.338462	0.4	5	6	FALSE	NPAS4	8	5	0	0	0.720779	FALSE	0	NPAS4	48	0.33913
206	3.23864	0.0449321	0.308772	0.333333	3	5	FALSE	DAO	5.33333	3	0	0	0.680195	FALSE	0	DAO	884	0.416667
208	2.40909	0.0272511	0.415094	0.266667	6	5	FALSE	TNNI3	13	6	0	0	0.798701	FALSE	0	TNNI3	576	0.25
222	2.47727	0.033181	0.40367	0.266667	6	5	FALSE	PDGFRA	13.8333	6	0	0	0.788961	FALSE	0	PDGFRA	604	0.293478
225	2.48864	0.00091843	0.401826	0.6	5	5	FALSE	TGFA	17.6	5	0	0	0.787338	FALSE	0	TGFA	48	0.366667
238	3	0.00010159	0.333333	0	2	5	FALSE	NEFH	13.5	2	0	0	0.714286	FALSE	0	NEFH	6	0.625
241	2.29545	0.0366136	0.435644	0.309091	11	5	FALSE	COL1A1	12.4545	11	0	0	0.814935	FALSE	0	COL1A1	1048	0.218501
254	3.92045	0	0.255072	0	1	7	FALSE	SGK3	5	1	0	0	0.582792	FALSE	0	SGK3	0	0
257	3.09091	0.00390709	0.323529	0.333333	3	6	FALSE	CRHR1	7.66667	3	0	0	0.701299	FALSE	0	CRHR1	92	0.407407
266	2.59091	0.00800137	0.385965	0	2	5	FALSE	PAWR	22	2	0	0	0.772727	FALSE	0	PAWR	204	0.512195
271	3.03409	0.00200428	0.329588	0.5	5	6	FALSE	COL4A2	8.4	5	0	0	0.709416	FALSE	0	COL4A2	70	0.41
280	2.79545	0.00509537	0.357724	0.52381	7	6	FALSE	THBS2	10.5714	7	0	0	0.743506	FALSE	0	THBS2	190	0.320346
289	2.48864	0.0287494	0.401826	0.3	5	4	FALSE	NQO1	12.8	5	0	0	0.787338	FALSE	0	NQO1	570	0.28
298	3.45455	0	0.289474	0	1	6	FALSE	CEPT1	5	1	0	0	0.649351	FALSE	0	CEPT1	0	0
306	2.48864	0.00098211	0.401826	0.666667	4	5	FALSE	P2RY1	18	4	0	0	0.787338	FALSE	0	P2RY1	36	0.382979
310	3.23864	0.0002264	0.308772	0	2	6	FALSE	ANGPT4	8	2	0	0	0.680195	FALSE	0	ANGPT4	8	0.583333
319	3.38636	0	0.295302	0	1	6	FALSE	FBN3	11	1	0	0	0.659091	FALSE	0	FBN3	0	0
322	3.45455	0	0.289474	0	1	6	FALSE	CYP4A11	5	1	0	0	0.649351	FALSE	0	CYP4A11	0	0
335	2.80682	0.00090927	0.356275	0.666667	3	5	FALSE	NR4A2	14.6667	3	0	0	0.741883	FALSE	0	NR4A2	48	0.473118
338	2.46591	0.0451661	0.40553	0.5	5	5	FALSE	ADORA3	17.2	5	0	0	0.790584	FALSE	0	ADORA3	794	0.354167
343	3.11364	0	0.321168	1	2	5	FALSE	UNC13B	10.5	2	0	0	0.698052	FALSE	0	UNC13B	0	0.65625
352	2.45455	0.0082641	0.407407	0.428571	8	5	FALSE	TIMP3	13.875	8	0	0	0.792208	FALSE	0	TIMP3	346	0.295213
359	2.42045	0.0147672	0.413146	0.285714	7	5	FALSE	AFP	13.8571	7	0	0	0.797078	FALSE	0	AFP	410	0.279883
362	3.45455	0	0.289474	0	1	6	FALSE	HTR1F	7	1	0	0	0.649351	FALSE	0	HTR1F	0	0
371	2.47727	0.00190982	0.40367	0.666667	4	5	FALSE	HDAC4	20	4	0	0	0.788961	FALSE	0	HDAC4	126	0.408163
378	2.51136	0.0126408	0.39819	0.333333	4	5	FALSE	BMP6	19.5	4	0	0	0.784091	FALSE	0	BMP6	352	0.418478
393	3.25	0	0.307692	1	2	6	FALSE	RBM20	7	2	0	0	0.678571	FALSE	0	RBM20	0	0.583333
420	2.73864	0.00123747	0.365145	0	2	5	FALSE	CASR	17.5	2	0	0	0.751623	FALSE	0	CASR	72	0.532258
437	3.04545	0.0006734	0.328358	0	2	5	FALSE	HTR2B	10	2	0	0	0.707792	FALSE	0	HTR2B	24	0.5625
454	2.56818	0.0227273	0.389381	0.333333	3	5	FALSE	ABCC1	16.3333	3	0	0	0.775974	FALSE	0	ABCC1	268	0.380952
455	3.55682	0	0.28115	0	1	6	FALSE	SLC22A1	3	1	0	0	0.63474	FALSE	0	SLC22A1	0	0
459	3.35227	0	0.298305	1	2	6	FALSE	ACSL4	4.5	2	0	0	0.663961	FALSE	0	ACSL4	0	0.642857
483	3.35227	0	0.298305	1	2	6	FALSE	SOAT1	4.5	2	0	0	0.663961	FALSE	0	SOAT1	0	0.642857
500	4.20455	0.0227273	0.237838	0	2	6	FALSE	CPS1	2	2	0	0	0.542208	FALSE	0	CPS1	444	0.5
503	3.26136	0.00013062	0.30662	0	2	6	FALSE	NKX2-1	6.5	2	0	0	0.676948	FALSE	0	NKX2-1	2	0.55
537	3.92045	0	0.255072	0	1	7	FALSE	SMG1	5	1	0	0	0.582792	FALSE	0	SMG1	0	0
569	2.57955	0	0.387665	1	2	5	FALSE	GABARAP	24	2	0	0	0.774351	FALSE	0	GABARAP	0	0.545455
575	3.47727	0	0.287582	0	1	5	FALSE	MT2A	5	1	0	0	0.646104	FALSE	0	MT2A	0	0
593	2.625	0	0.380952	0	1	5	FALSE	ADM	41	1	0	0	0.767857	FALSE	0	ADM	0	0
615	5.19318	0	0.19256	0	1	7	FALSE	PNP	2	1	0	0	0.400974	FALSE	0	PNP	0	0
620	3.79545	0	0.263473	0	1	6	FALSE	DACH1	8	1	0	0	0.600649	FALSE	0	DACH1	0	0
640	3.46591	0	0.288525	0	1	6	FALSE	NRP2	6	1	0	0	0.647727	FALSE	0	NRP2	0	0
