# Supplementary material for: Lycorine Inhibits Angiogenesis by Docking to PDGFRα
Source: Research Square preprint supplement (doi:10.21203/rs.3.rs-1327411/v1), 2022-02-17
Supplement: Supplementary file 10 [file 653d9343a22d33f4fb44b735.xlsx]

## Sheet: summary
	mean	SD
Lyc 0 uM+PDGF-AA 0 ng/ml	1.00531	0.0165494
Lyc 0 uM+PDGF-AA 25 ng/ml	1.20981	0.0178157
Lyc 6 uM+PDGF-AA 25 ng/ml	0.743417	0.0395738

## Sheet: 1
	Lyc 0 uM+PDGF-AA 0 ng/ml	Lyc 0 uM+PDGF-AA 25 ng/ml	Lyc 6 uM+PDGF-AA 25 ng/ml
well1	1	1.16533	0.828
well2	1.048	1.32067	0.7
well3	0.953333	1.218	0.796
mean	1.00044	1.23467	0.774667
SD	0.0397076	0.0645004	0.0543895

## Sheet: 2
	Lyc 0 uM+PDGF-AA 0 ng/ml	Lyc 0 uM+PDGF-AA 25 ng/ml	Lyc 6 uM+PDGF-AA 25 ng/ml
well1	1	1.18967	0.738417
well2	0.975861	1.21967	0.737167
well3	0.973361	1.19342	0.828417
mean	0.984194	1.20092	0.768
SD	0.0135913	0.0133463	0.0427241

## Sheet: 3
	Lyc 0 uM+PDGF-AA 0 ng/ml	Lyc 0 uM+PDGF-AA 25 ng/ml	Lyc 6 uM+PDGF-AA 25 ng/ml
well1	1	1.12342	0.718417
well2	0.957111	1.19342	0.679667
well3	1.07211	1.26467	0.664667
mean	1.00974	1.19383	0.687583
SD	0.0490323	0.0576658	0.0226461
