# Supplementary material for: Lycorine Inhibits Angiogenesis by Docking to PDGFRα
Source: Research Square preprint supplement (doi:10.21203/rs.3.rs-1327411/v1), 2022-02-17
Supplement: Supplementary file 12 [file 8cdc66713eeb4fdf3de18353.xlsx]

## Sheet: summary
		cell viability
		24h		48h
concentration(uM)	log(concentration)	mean	sd	mean	sd
0		1.00311	0.00556	1.00831	0.0199658
0.01	-2	0.942222	0.0106713	0.906998	0.0101159
0.05	-1.30103	0.922111	0.0240098	0.833561	0.0191412
0.1	-1	0.846667	0.0262057	0.758	0.00780788
1	0	0.748	0.0137356	0.61503	0.0230992
5	0.69897	0.604556	0.0156473	0.482318	0.0100471
10	1	0.456667	0.0471224	0.317563	0.0272939
25	1.39794	0.326444	0.0150317	0.188298	0.0278402
50	1.69897	0.180444	0.0213478	0.097601	0.022558
														#DIV/0!

## Sheet: MTT-24h-1
concentration(uM)	0	0.01	0.05	0.1	1	5	10	25	50
well1	1	0.954	0.93	0.859	0.737	0.623	0.472	0.325	0.167
well2	1.012	0.962	0.918	0.863	0.745	0.623	0.476	0.321	0.175
well3	0.973	0.952	0.873	0.868	0.78	0.613	0.491
mean	0.995333	0.956	0.907	0.863333	0.754	0.619667	0.479667	0.323	0.171
SD	0.0164181	0.00432049	0.0245357	0.00368179	0.0186726	0.00471405	0.00817856

## Sheet: MTT-24h-2
concentration(uM)	0	0.01	0.05	0.1	1	5	10	25	50
well1	1.002	1.042	0.966	0.809	0.707	0.579	0.508		0.129
well2	1.01	0.888	0.96	0.865		0.615	0.542	0.285	0.155
well3	1.016	0.892	0.942	0.927	0.751	0.639	0.448	0.335	0.197
mean	1.006	0.940667	0.956	0.867	0.729	0.611	0.499333	0.31	0.160333
SD	0.0386092	0.0716721	0.010198	0.0481941		0.0246577	0.0388616		0.0280159

## Sheet: MTT-24h-3
concentration(uM)	0	0.01	0.05	0.1	1	5	10	25	50
well1	1	0.924	0.896	0.837		0.627	0.396	0.389	0.217
well2	1.002		0.922	0.805	0.779	0.557		0.305
well3	1.016	0.936	0.892	0.787	0.743	0.565	0.386	0.345	0.203
mean	1.008	0.93	0.903333	0.809667	0.761	0.583	0.391	0.346333	0.21
SD	0.0226863		0.0133	0.0206774		0.0312836		0.0343058

## Sheet: MTT-48h-1
concentration(uM)	0	0.01	0.05	0.1	1	5	10	25	50
well1	1		0.8145	0.7685	0.659	0.492	0.3575	0.1965	0.0715
well2	0.989	0.92	0.837	0.7635	0.6715	0.4645		0.159
well3	0.994	0.8775	0.822	0.756	0.6115	0.482	0.34	0.174	0.0615
mean	0.9965	0.89875	0.8245	0.762667	0.647333	0.4795	0.34875	0.1765	0.0665
SD	0.0073598	0.02125	0.00935414	0.00513701	0.0258468	0.0113652	0.00875	0.015411	0.005

## Sheet: MTT-48h-2
concentration(uM)	0	0.01	0.05	0.1	1	5	10	25	50
well1	1		0.822	0.741	0.598	0.473	0.291	0.118
well2	1.018	0.922	0.81	0.781	0.564	0.457	0.339	0.196	0.101
well3	98.20%%	0.88		0.719	0.622	0.485	0.335	0.171	0.113
mean	1.009	0.901	0.816	0.747	0.594667	0.471667	0.321667	0.161667	0.107
SD	0.0272764	0.021		0.0256645	0.0237954	0.0114698	0.021746	0.0325201

## Sheet: MTT-48h-3
concentration(uM)	0	0.01	0.05	0.1	1	5	10	25	50
well1	1	0.934545		0.809182	0.613091	0.489727	0.269545		0.0908182
well2	1.01945	0.9001	0.845636	0.747364	0.562182	0.462455	0.298636	0.224909	0.121727
well3	1.05036	0.929091	0.874727	0.736455	0.634	0.535182	0.278636	0.228545	0.145364
mean	1.02327	0.921245	0.860182	0.764333	0.603091	0.495788	0.282273	0.226727	0.119303
SD	0.0127992	0.015117	0.0145455	0.0320239	0.0301603	0.0299985	0.0121515	0.00181818	0.022334
