# Supplementary material for: Lycorine Inhibits Angiogenesis by Docking to PDGFRα
Source: Research Square preprint supplement (doi:10.21203/rs.3.rs-1327411/v1), 2022-02-17
Supplement: Supplementary file 13 [file c887a6b009c5f189fdf80047.xlsx]

## Sheet: Figure 6C
	Conc.(M)	1
-4	0.0001	0.2
-4.47712	3.33333e-05	0.11
-4.95424	1.11111e-05	5.77
-5.43136	3.7037e-06	15.67
-5.90849	1.23457e-06	42.56
-6.38561	4.11523e-07	63.76
-6.86273	1.37174e-07	84.56
-7.33985	4.57247e-08	97.65
-7.81697	1.52416e-08	96.5286
-8.29409	5.08053e-09	96.8826
	DMSO	96.126

## Sheet: Figure 6D
concentration (uM)	response
15.625	18
31.25	28
62.5	42
125	54
250	72
500	100
1000	124

## Sheet: Figure 6E
time	Channel1:PDGFR 15.625 uM	Channel2: PDGFR 31.25 uM	Channel3: VPDGFR 62.5 uM	Channel4: PDGFR 125 uM	Channel5: PDGFR 250 uM	Channel6: PDGFR 500 uM	Channel7: PDGFR 1000 uM
-20	-0.42	0.09	0.47	0.27	-0.1	0.13	-0.2
-19.9	0.15	0.39	0.32	-0.06	-0.25	0.08	-0.43
-19.8	-0.48	0.26	-0.24	0.25	-0.39	-0.42	-0.48
-19.7	0.14	0.17	-0.03	0.16	0.39	0.02	0.28
-19.6	0.1	0.35	-0.28	-0.07	-0.13	-0.19	-0.21
-19.5	-0.09	-0.13	-0.34	0.13	-0.11	-0.36	0.07
-19.4	-0.14	-0.06	-0.1	-0.5	0.29	-0.36	0.04
-19.3	-0.08	-0.19	-0.24	0.33	-0.02	0.41	0.22
-19.2	-0.08	-0.33	-0.1	0.2	-0.06	0.01	-0.48
-19.1	-0.2	-0.15	0.14	0.12	-0.02	-0.35	0.2
-19	-0.13	0.22	-0.17	-0.35	-0.5	0.4	0.14
-18.9	-0.12	0.14	0.07	-0.3	0.46	0.27	0.33
-18.8	-0.01	-0.47	0.3	-0.22	-0.33	-0.29	0.47
-18.7	-0.46	-0.01	0.42	0.15	0.05	-0.37	0.08
-18.6	0.85	0.02	0.1	0.44	-0.37	-0.29	0.37
-18.5	-0.39	-0.06	-0.37	-0.47	-0.47	-0.33	0.41
-18.4	0.21	-0.3	0.19	-0.33	-0.21	0.3	-0.28
-18.3	-0.12	0.03	0.22	0.44	0.28	-0.07	0.11
-18.2	-0.01	-0.11	0.39	-0.22	-0.38	-0.28	0.48
-18.1	-0.01	0.46	-0.49	0.17	0.32	-0.09	-0.12
-18	0.02	0.45	0.1	0.25	-0.01	-0.44	0.36
-17.9	-0.08	0.1	-0.11	0.21	-0.02	-0.02	0.31
-17.8	-0.15	0.42	-0.48	-0.06	0.22	-0.07	0.16
-17.7	-0.39	0.44	0.4	0.44	0.46	-0.33	-0.27
-17.6	-0.35	0.35	-0.17	-0.38	0.24	0.05	0.06
-17.5	-0.06	-0.18	-0.41	0.46	0.35	-0.42	-0.5
-17.4	-0.23	0.39	-0.22	-0.38	0.24	-0.45	0.01
-17.3	-0.49	-0.03	0.32	0.06	-0.07	0.11	0.22
-17.2	-0.26	-0.37	-0.43	0.46	0.4	-0.36	-0.37
-17.1	-0.38	-0.1	0.08	0.13	-0.03	-0.41	-0.43
-17	0.04	0.28	0.06	0.28	0.02	-0.02	-0.19
-16.9	0.3	-0.86	-0.03	-0.06	0.19	0.07	0.1
-16.8	-0.5	0.12	0.3	0.14	0.2	0.48	-0.48
-16.7	0.04	-0.19	-0.45	-0.34	-0.21	0.24	-0.05
-16.6	-0.49	-0.28	0.09	0.48	-0.19	-0.28	0.37
-16.5	0.37	0.1	0.35	0.15	0.41	-0.06	-0.2
-16.4	-0.18	0.34	0.4	-0.37	0.4	-0.06	0.4
-16.3	0.47	0	-0.46	0.08	-0.07	0.23	0.29
-16.2	0.03	-0.1	-0.13	0.08	-0.46	-0.09	0.26
-16.1	-0.33	-0.4	0.07	0.07	0.28	-0.09	0.17
-16	-0.22	-0.23	-0.24	0.25	0.12	-0.35	0.14
-15.9	0.49	0.33	0.23	0.43	0.2	-0.32	-0.3
-15.8	0.18	-0.29	0.15	-0.4	-0.28	0.39	-0.4
-15.7	-0.24	-0.4	0.88	-0.39	0.38	0.37	0.49
-15.6	0.13	-0.45	-0.21	0.16	-0.35	-0.35	0.25
-15.5	0.18	0.24	-0.32	0.2	0.36	-0.28	-0.3
-15.4	0.01	0.13	-0.05	0.19	-0.38	0.27	0.11
-15.3	-0.37	-0.05	0.15	-0.28	0.25	-0.4	-0.05
-15.2	-0.28	-0.1	-0.47	0.21	-0.02	0.09	-0.08
-15.1	-0.24	-0.25	-0.49	-0.04	-0.4	0.49	0.2
-15	-0.14	-0.05	0.21	0.07	-0.01	0.16	0.32
-14.9	0.41	-0.42	-0.45	-0.29	0.12	-0.49	-0.2
-14.8	0.49	0.32	0.27	0.32	-0.11	0.23	0.27
-14.7	-0.31	-0.16	0.48	-0.39	0.2	0.28	0.27
-14.6	0	-0.21	-0.37	0.2	0.43	-0.32	0.49
-14.5	0.01	-0.14	-0.37	-0.15	0.41	0.27	-0.03
-14.4	0.45	-0.06	-0.01	0.28	-0.21	-0.18	0.13
-14.3	0.17	0.06	0.37	0.12	0.15	-0.07	0.17
-14.2	-0.23	0.33	-0.41	0.18	0.16	-0.36	0.03
-14.1	0.18	0.08	-0.06	0.08	-0.5	-0.2	-0.16
-14	0.09	0.4	-0.47	-0.25	0.01	0.19	-0.26
-13.9	0.39	0.31	0.2	-0.18	-0.42	0.09	-0.4
-13.8	-0.34	0.05	-0.04	0.46	-0.33	-0.27	-0.2
-13.7	-0.46	0.36	0.32	-0.98	-0.28	0.06	-0.37
-13.6	0.39	-0.35	0.39	0.21	0.17	0.4	0.49
-13.5	-0.07	0.03	0.04	-0.2	-0.02	-0.13	0.28
-13.4	0.2	0.18	0.5	0.12	-0.49	0.2	0.03
-13.3	0.19	-0.5	-0.43	-0.18	-0.13	-0.02	-0.43
-13.2	0.02	-0.15	0.16	0.34	0.46	0.35	0.39
-13.1	0.19	-0.46	-0.47	-0.45	0.4	0.41	-0.37
-13	-0.03	0.15	0.17	-0.19	0.28	-0.37	0.25
-12.9	0.48	-0.3	-0.28	0.09	0.06	-0.43	-0.32
-12.8	-0.32	0.12	0.15	-0.28	-0.23	-0.4	0.31
-12.7	0.24	-0.16	-0.35	-0.25	-0.4	-0.45	-0.02
-12.6	0.2	-0.19	-0.23	0.01	0.06	-0.41	0.14
-12.5	0.48	-0.36	-0.5	0.27	-0.11	0.29	0.42
-12.4	0.2	0.15	-0.46	-0.24	-0.11	0.43	0.32
-12.3	0.31	0.36	-0.36	-0.32	0.37	0.33	0.25
-12.2	0.49	0.21	0.14	0.38	0.49	-0.27	-0.46
-12.1	0.44	0.17	0.15	0.26	-0.27	-0.43	-0.1
-12	-0.35	0.2	0.27	0.16	-0.87	-0.42	-0.29
-11.9	-0.5	0.31	0.31	0.08	0.37	-0.38	-0.15
-11.8	-0.41	-0.39	-0.28	-0.42	0.31	-0.18	0.45
-11.7	0.16	-0.12	0.09	0.47	0.15	0.23	-0.12
-11.6	-0.06	-0.38	0.47	-0.16	0.05	0.47	0.43
-11.5	0.28	0.38	-0.34	-0.35	0.43	-0.02	0.39
-11.4	-0.02	-0.06	0.02	-0.28	0.43	-0.46	-0.03
-11.3	-0.41	-0.22	-0.07	0.48	0.23	0.06	-0.2
-11.2	0.2	-0.05	0.26	-0.31	-0.17	0.19	-0.13
-11.1	0.28	-0.11	-0.44	0.16	0.19	0.02	-0.08
-11	0.37	-0.03	-0.47	0.5	-0.05	0.13	-0.02
-10.9	0.39	-0.45	-0.19	0.22	0.15	0.19	-0.25
-10.8	0.15	0.21	0.09	0.01	0.32	0.27	-0.29
-10.7	-0.28	-0.38	-0.32	-0.19	0.02	0.04	-0.14
-10.6	-0.25	-0.29	0.31	0.03	-0.24	-0.44	0.19
-10.5	0.14	0.27	0.49	0.1	-0.05	-0.2	0.5
-10.4	-0.25	-0.11	-0.36	0.45	0.09	0.91	0.4
-10.3	0.37	-0.24	0.26	-0.02	-0.01	-0.09	0.18
-10.2	0.34	-0.37	0.03	-0.35	-0.14	-0.25	-0.27
-10.1	0.34	-0.12	0.34	-0.44	-0.24	0.38	-0.24
-10	-0.08	-0.29	0.09	0.17	0.18	0.07	0.22
-9.9	-0.37	0.46	-0.14	0.48	-0.19	-0.19	0.4
-9.8	0.2	0.25	-0.06	-0.38	0.02	-0.03	-0.34
-9.7	-0.04	0.03	-0.41	0	-0.08	0.11	-0.04
-9.6	-0.15	0.47	-0.33	0.04	-0.07	-0.17	-0.03
-9.5	0.17	0.09	-0.2	-0.09	-0.2	0	0.12
-9.4	0.44	-0.36	0.2	0.01	-0.16	0.28	0.14
-9.3	-0.05	0.17	0.05	-0.36	-0.01	-0.26	-0.16
-9.2	0.13	-0.38	0.33	0.43	0.18	0.47	0.23
-9.1	-0.44	0.46	-0.5	-0.5	-0.25	0.01	-0.09
-9	-0.46	0.48	0.31	-0.04	0.21	0.27	-0.43
-8.9	-0.08	-0.03	0.15	-0.21	-0.15	0.07	0.45
-8.8	-0.46	0.34	0.27	0.28	0.09	0.13	-0.18
-8.7	-0.17	-0.29	-0.49	0.41	0.15	-0.32	0.18
-8.6	0.06	0.01	0.34	0.25	-0.48	0.3	0.46
-8.5	0.23	0.19	0.45	0.29	0.06	0.07	-0.47
-8.4	0.23	0.5	-0.12	-0.24	-0.27	-0.23	0.5
-8.3	0.11	-0.09	0.3	0.28	0.02	-0.29	-0.1
-8.2	-0.46	0.15	-0.32	0.21	-0.44	-0.5	-0.83
-8.1	0.46	0.31	-0.16	-0.13	0.03	-0.34	-0.42
-8	0.05	0.31	-0.39	-0.16	0.24	0	-0.49
-7.9	0.45	0.14	-0.34	0.48	-0.04	-0.32	-0.27
-7.8	-0.06	-0.23	-0.02	0.13	0.12	0.14	-0.27
-7.7	0.07	-0.1	0.29	-0.25	-0.38	0.07	-0.44
-7.6	0.25	0.06	0.42	0.01	-0.34	0.31	-0.18
-7.5	0.38	-0.31	-0.03	-0.29	0.46	-0.12	-0.35
-7.4	-0.37	0.23	-0.19	0.12	-0.01	-0.31	0.04
-7.3	-0.03	-0.46	0.23	0.46	0.33	-0.19	0.13
-7.2	-0.13	0.24	-0.05	-0.42	-0.07	0.08	0.12
-7.1	-0.3	0.22	-0.03	0.21	0.15	-0.01	-0.23
-7	0.26	0.49	0.21	-0.03	-0.42	-0.09	0.03
-6.9	0.02	0.49	-0.39	-0.16	-0.17	-0.24	0.46
-6.8	0.41	-0.46	0.26	-0.86	0.47	0.32	0.33
-6.7	0.46	0.48	-0.38	0.35	0.33	-0.42	0.02
-6.6	0.21	0.35	0.18	0.45	0.33	0.23	0.19
-6.5	0.05	0.36	-0.43	-0.38	0.46	0.44	0.34
-6.4	0.45	0.32	-0.07	0.22	0.07	0.15	-0.01
-6.3	0.33	0.19	0.25	0.46	-0.16	0.29	0.45
-6.2	-0.32	-0.33	0.28	0.09	0.32	-0.05	0.33
-6.1	-0.03	0.3	0.12	0.24	-0.15	0.2	0.5
-6	0.39	-0.05	0.26	-0.16	-0.18	0.37	0.06
-5.9	-0.24	0.85	0.03	-0.07	0.07	-0.39	-0.49
-5.8	-0.21	-0.23	0.3	-0.09	-0.03	0.28	-0.1
-5.7	-0.07	0.33	0.4	0.26	0.24	0.3	0.46
-5.6	0.13	-0.03	-0.03	-0.43	-0.29	-0.36	-0.23
-5.5	-0.2	0.12	0.2	0.42	-0.49	-0.29	-0.3
-5.4	0.16	-0.35	0.33	0.12	0.45	0.04	0.48
-5.3	0.5	-0.1	-0.16	0.29	-0.31	-0.19	-0.07
-5.2	0.14	0.1	-0.44	0.01	0.32	-0.35	0.02
-5.1	-0.07	-0.02	-0.47	0.47	0.02	-0.29	0.45
-5	-0.28	-0.41	0.09	-0.14	0.25	0.42	-0.13
-4.9	0.26	0.02	-0.44	-0.32	-0.25	0.32	0.24
-4.8	-0.26	-0.48	-0.06	0.25	-0.1	-0.39	-0.24
-4.7	0.28	0.45	0	0.45	-0.36	-0.45	0.5
-4.6	0.43	-0.13	-0.18	0.29	-0.27	-0.01	0.23
-4.5	-0.86	-0.1	0.01	-0.12	-0.14	-0.49	0.26
-4.4	0.43	-0.24	-0.16	0.44	0.32	0.16	0.13
-4.3	0.3	0.14	0.26	0.24	0.22	0.35	0.07
-4.2	-0.3	-0.31	0.02	0.02	-0.01	0.05	0.38
-4.1	-0.47	-0.15	-0.39	0.06	0.21	-0.11	-0.42
-4	0.19	-0.49	0.32	0.13	-0.33	-0.5	-0.06
-3.9	0.09	-0.11	-0.09	-0.06	-0.49	0.5	-0.39
-3.8	0.12	-0.35	-0.25	0.21	-0.16	0.18	0.02
-3.7	0.46	0.02	-0.15	-0.34	0.02	0	0.47
-3.6	0.34	0.16	-0.27	-0.33	-0.41	-0.06	-0.37
-3.5	-0.15	0.17	-0.17	0.37	-0.1	0.1	-0.23
-3.4	-0.27	0.14	0.11	0.31	-0.38	-0.31	0.33
-3.3	-0.21	-0.07	-0.31	-0.07	-0.02	-0.14	-0.25
-3.2	-0.02	-0.13	-0.4	0.05	0.02	0.44	-0.02
-3.1	-0.31	-0.48	0.04	0.4	0.23	-0.17	-0.3
-3	-0.34	0.04	-0.06	-0.32	0.01	-0.43	0.47
-2.9	0.18	0.24	0.14	0.35	-0.45	0.32	-0.4
-2.8	-0.04	0.23	0	-0.49	0.26	-0.42	0.47
-2.7	0.06	0.31	-0.16	0.37	-0.15	0.44	-0.29
-2.6	-0.32	-0.06	0.41	0.18	-0.04	-0.22	-0.16
-2.5	-0.09	0.05	0.05	0.47	0.12	-0.06	-0.19
-2.4	-0.13	-0.26	0.07	-0.41	-0.18	-0.47	0.05
-2.3	0.01	0.31	0.18	-0.42	-0.07	0.09	-0.44
-2.2	-0.45	-0.13	0.29	-0.45	-0.02	-0.45	-0.28
-2.1	0.21	-0.3	0.19	0.27	-0.38	-0.14	0.42
-2	0.14	0.43	0.34	-0.18	-0.37	0.42	-0.29
-1.9	-0.46	0.32	0.06	-0.28	0.01	0.41	-0.24
-1.8	0.45	-0.31	-0.44	-0.3	0.41	-0.2	-0.16
-1.7	0.05	0	0.47	-0.32	-0.46	-0.31	-0.12
-1.6	-0.15	-0.16	0.29	-0.21	-0.09	-0.21	0.48
-1.5	-0.44	-0.5	0.45	-0.43	0.98	-0.1	-0.41
-1.4	0.3	0.34	0.24	-0.05	-0.14	0.21	-0.06
-1.3	-0.32	-0.24	0.43	0.08	0.13	-0.24	-0.36
-1.2	0.29	0.47	-0.48	0.03	-0.15	0.11	0.29
-1.1	0.2	-0.07	0.36	-0.46	-0.33	0.21	-0.27
-1	0.29	0.05	0.04	-0.47	0.31	-0.49	-0.16
-0.9	0.14	0.07	0.46	-0.42	-0.04	-0.46	0.25
-0.8	0.14	0.13	-0.12	0.18	-0.27	0.12	0.35
-0.7	0.23	-0.24	0.3	-0.01	-0.02	-0.21	0.38
-0.6	0.01	0.25	-0.14	0.33	-0.34	0.03	0.42
-0.5	0.16	0.2	0.16	-0.49	0.05	-0.32	-0.33
-0.4	0.16	0.42	-0.12	-0.43	0.16	-0.13	-0.42
-0.3
-0.2
-0.1
1.52933e-14	-0.1	0.1	-0.13	0.47	0.09	-0.47	0.02
0.1	-0.12	-0.44	0.19	0.02	-0.3	-0.21	0.18
0.2	0.17	0.21	0.3	0.24	0.37	-0.26	-0.01
0.3	0.17	-0.39	0.13	0.37	0.44	0.24	-0.18
0.4	0.05	0.29	0.28	-0.46	-0.23	-0.37	-0.46
0.5	18	-0.07	0.06	0.13	-0.17	-0.4	0.46
0.6	18.12	0.2	0.43	-0.29	0.05	-0.35	0.01
0.7	17.89	28	0.21	0.44	-0.48	0.43	-0.39
0.8	17.81	27.94	-0.08	-0.27	-0.15	-0.27	-0.12
0.9	17.99	28.18	42	0.1	-0.45	-0.47	-0.41
1	17.81	28.13	41.85	54	-0.44	0.11	0.22
1.1	18.08	27.84	41.62	53.85	72	-0.4	-0.25
1.2	17.9	28.16	41.99	53.74	71.25	100	-0.14
1.3	17.86	28.21	41.51	53.48	72.09	99.86	-0.18
1.4	17.86	28.07	41.8	53.7	71.17	99.62	124
1.5	18.12	28.05	41.67	53.41	71.33	99.73	123.63
1.6	18.17	27.82	42.04	53.73	71.45	100.01	123.28
1.7	17.9	27.85	41.54	53.83	71.47	99.71	123.85
1.8	17.95	28.19	41.75	53.5	71.26	99.81	122.64
1.9	17.86	28.26	41.52	53.66	71.3	99.77	123.91
2	18.16	28	42.11	53.69	71.28	99.96	122.55
2.1	18.01	28.21	41.75	53.68	71.48	99.25	122.88
2.2	17.84	27.85	41.8	53.8	71.75	100.03	123.41
2.3	17.93	27.73	41.56	53.41	71.72	99.01	122.96
2.4	18.07	28.16	41.6	53.4	71.58	100.08	123.42
2.5	18.2	27.83	41.7	53.74	71.71	100.12	124.09
2.6	19.08	27.74	41.8	53.47	71.87	99.14	122.38
2.7	17.95	27.8	42.07	53.39	71.58	99.4	123.41
2.8	18.2	28.12	41.58	53.47	71.54	99.12	122.63
2.9	18.03	27.99	41.55	53.44	72.05	99.78	124.03
3	17.93	27.85	41.84	53.66	72.07	99.12	123.05
3.1	17.92	28.19	41.88	53.81	71.81	100.03	122.7
3.2	17.98	28.06	41.87	53.79	71.71	99.88	122.58
3.3	17.88	28.28	41.9	53.66	71.46	99.79	122.82
3.4	17.87	28.24	41.91	53.61	71.6	99.38	123.89
3.5	18.06	27.74	42.04	53.62	71.27	99.23	123.72
3.6	17.88	28.17	41.72	53.82	71.81	99.92	123.75
3.7	17.86	28.13	41.67	53.63	72.12	99.05	123.12
3.8	17.99	28.07	41.6	53.56	72.06	100.06	123.2
3.9	18.15	27.76	41.78	53.45	71.74	99.86	123.72
4	18.06	27.72	41.63	53.88	71.94	99.68	122.44
4.1	17.8	27.99	41.62	53.76	71.4	99.31	123.02
4.2	18	28.16	41.57	53.84	71.6	99.68	122.96
4.3	18.01	28.14	42.11	53.67	72.14	100.12	124.27
4.4	18.2	27.98	42.04	53.8	71.18	99.78	123
4.5	18.05	28.27	41.89	53.67	71.73	99.91	123.52
4.6	17.86	27.98	41.78	53.72	71.25	100.12	122.95
4.7	18.03	28.22	41.66	53.52	71.5	99.78	124.13
4.8	18.07	26.85	41.98	53.89	72.13	99.26	122.75
4.9	18.05	28.2	41.93	53.55	71.68	99.83	122.76
5	18.18	27.72	42.02	53.86	71.94	99	122.56
5.1	17.9	27.91	41.75	53.63	71.18	99.37	123.55
5.2	17.83	28.21	41.72	53.61	72.18	99.05	122.92
5.3	17.83	28.26	41.54	53.81	71.31	100.06	122.52
5.4	17.83	28.12	41.7	53.73	71.88	99.18	123.37
5.5	18.06	28.3	41.75	53.7	72.03	99.61	123.53
5.6	17.82	28.09	41.78	53.5	71.82	99.1	122.86
5.7	18.09	27.9	41.93	53.7	71.87	99.28	123.19
5.8	17.84	28.19	41.73	53.79	71.72	99.85	124.34
5.9	18.02	28.27	41.93	53.56	71.75	99.25	122.93
6	18.18	28.14	42.05	53.81	71.49	99.4	122.57
6.1	17.84	27.75	42.03	53.45	71.48	99.48	122.97
6.2	17.98	27.92	41.77	53.9	71.31	99.23	123.94
6.3	17.8	27.77	41.98	53.5	72.06	99.05	123.9
6.4	17.95	28.11	42	53.54	71.88	99.68	124.08
6.5	17.94	27.83	41.68	53.81	71.38	100.12	122.81
6.6	17.87	28	41.6	53.46	71.86	99.25	124.14
6.7	17.84	28.21	42.06	53.48	72.03	99.05	123.96
6.8	17.93	27.87	41.6	53.47	71.32	100.17	122.53
6.9	17.91	28.29	41.65	53.65	72.13	99.3	124.14
7	18.12	28.06	41.55	53.6	71.44	99.16	123.09
7.1	17.95	28.1	42.1	53.54	72.08	99.35	123.49
7.2	18.1	27.95	41.68	53.78	72.02	99.76	123.1
7.3	17.99	27.79	41.63	53.46	71.65	99.47	124.38
7.4	18.18	27.85	41.75	53.94	71.22	100.02	123.91
7.5	18.13	27.79	42.16	53.89	71.94	100.09	122.58
7.6	18.14	28.25	42.08	53.97	71.23	99.53	123.63
7.7	18.03	27.99	42.05	53.71	71.33	100.11	122.53
7.8	18.19	27.8	42.04	53.47	71.4	99.94	123.83
7.9	18.13	27.75	42.1	53.74	71.34	100.06	123.13
8	18.12	27.99	41.92	53.97	71.52	100.13	122.6
8.1	18.18	28.27	41.58	53.75	71.52	100.18	122.98
8.2	17.99	28.07	41.56	53.87	72.08	99.84	124.2
8.3	17.9	27.82	42	53.78	71.72	99.15	122.87
8.4	17.86	27.98	41.79	53.82	71.91	99.71	123.61
8.5	18.11	28.14	41.94	53.75	72.22	99.78	123.39
8.6	18.16	28.04	41.62	53.82	71.32	99.78	122.87
8.7	17.89	27.94	42.04	53.55	72.12	99.38	124.35
8.8	17.81	27.94	41.58	53.91	71.71	99.66	122.61
8.9	18.19	27.86	41.58	53.53	72.07	100.22	123.79
9	18.07	27.86	42.07	53.94	71.56	100.19	124.09
9.1	17.87	27.96	42.99	53.87	71.64	99.77	124.42
9.2	17.99	27.74	41.95	53.52	71.32	99.06	123.53
9.3	18.1	27.87	41.59	53.84	72.05	99.16	123.63
9.4	18.13	28.05	41.66	53.55	72.02	99.24	123.62
9.5	17.94	28	41.86	53.87	71.63	99.53	123.16
9.6	17.94	28.05	41.7	53.7	71.7	99.65	122.84
9.7	17.94	28.03	41.65	53.61	71.48	99.92	124
9.8	17.89	27.85	41.89	53.81	71.65	99.38	124.05
9.9	17.96	28.01	42.04	53.71	71.3	99.98	123.01
10	18.06	28.05	42.06	53.54	71.8	99.56	122.92
10.1	18.01	28	42.12	53.83	71.6	99.38	124.24
10.2	17.92	28.17	42.01	53.57	71.77	100.1	124.47
10.3	17.93	27.71	41.77	53.88	71.41	100.01	123.67
10.4	18.2	27.9	41.76	53.75	71.58	99.11	124.38
10.5	18.15	27.85	42.03	53.96	72.12	99.84	124.34
10.6	17.99	28.23	41.8	53.91	71.28	99.42	124.31
10.7	17.8	28.26	41.82	53.58	71.81	100.22	124.18
10.8	18.16	28.23	41.73	53.6	71.54	99.94	123.73
10.9	18.06	27.7	41.82	53.6	72.08	99.74	123.66
11	17.82	28.27	42.15	53.79	71.53	99.25	122.96
11.1	17.82	28.13	41.93	53.8	72.19	99.45	122.74
11.2	17.82	28.29	42.17	53.62	72.15	99.37	123.15
11.3	18.2	27.94	41.98	53.74	71.83	99.96	123.91
11.4	18.08	28.15	41.76	53.74	71.66	99.36	124.05
11.5	17.88	27.89	41.9	53.98	71.82	99.56	122.74
11.6	17.94	28.16	41.92	53.88	72.21	99.24	123.65
11.7	18.02	28.3	41.83	53.79	72.08	100.03	124.46
11.8	18.2	28.09	42.19	53.95	72.01	100.21	124.54
11.9	18.03	27.76	42.19	53.9	72.2	99.42	122.82
12	18.11	28.04	41.92	53.77	72.26	100.09	124.37
12.1	18.02	28.09	41.67	53.56	71.84	100.05	122.77
12.2	17.86	28.2	42.19	53.88	71.69	99.18	122.67
12.3	17.98	28.3	41.63	53.91	71.84	99.18	123.25
12.4	17.87	28.15	42.09	53.84	72.02	99.7	124.54
12.5	17.95	28.06	41.66	53.8	71.67	99.19	123.94
12.6	18.07	27.78	42.06	53.82	71.28	99.83	123.43
12.7	17.83	28.03	41.95	53.79	71.54	99.6	124.18
12.8	17.83	28.17	42.03	53.57	71.57	99.43	123.92
12.9	17.97	28.16	42.01	53.63	71.38	99.98	123.49
13	17.89	27.85	41.6	53.6	71.34	99.33	124.5
13.1	18.05	28.05	41.87	54	71.48	99.88	124.1
13.2	18.11	27.72	42.91	53.97	72.26	99.88	124.45
13.3	18.02	27.91	41.97	53.55	72.23	99.16	123.55
13.4	18.12	27.96	41.62	53.86	71.52	99.48	124.4
13.5	18.04	28.15	42.19	53.94	71.95	99.78	124.18
13.6	18.13	28.01	41.73	53.88	71.74	99.85	124.37
13.7	18.2	28.11	41.93	53.55	71.55	100.24	124.39
13.8	17.86	27.84	41.88	54	71.82	99.37	124.46
13.9	18.07	28.14	42.19	53.62	71.33	99.17	123.85
14	17.91	28.21	41.63	53.89	71.4	99.75	122.84
14.1	18.04	28.16	41.62	53.75	72.1	99.46	124.02
14.2	17.88	28.2	41.96	53.58	72.16	99.47	124.37
14.3	18.13	28.16	41.73	53.59	71.59	100.13	123.18
14.4	17.88	27.95	41.89	53.63	71.43	100.07	123.99
14.5	18.08	27.87	42.05	53.69	71.71	99.66	123.34
14.6	17.85	27.76	41.86	54.04	71.62	100.05	124.12
14.7	18.13	27.95	42.11	53.83	71.48	99.73	123.77
14.8	17.95	28.01	41.95	53.63	71.49	99.56	123.2
14.9	17.96	28.28	42.13	53.88	71.65	99.87	123.4
15	18.04	28.3	41.76	53.68	71.38	99.65	124.41
15.1	17.98	27.85	41.99	53.96	71.82	99.93	123.09
15.2	17.88	28.06	41.91	53.64	71.98	99.43	123.12
15.3	18.11	28.12	41.67	53.79	71.47	99.32	123.43
15.4	18.11	28.16	41.96	53.74	72.23	99.4	123.97
15.5	17.88	28.22	42.12	54	71.85	99.41	124.41
15.6	17.84	27.72	41.68	53.91	71.38	99.63	124.62
15.7	17.94	27.89	42.22	53.95	72.01	99.3	123.98
15.8	18.16	28.01	42.15	53.75	72.27	99.91	123.76
15.9	18.17	28.12	41.89	53.97	71.41	99.62	124.02
16	18.04	27.96	42	53.83	71.9	99.99	124.51
16.1	18.02	28.11	41.99	54.06	72.17	100.28	123.91
16.2	18.02	28.01	42.22	53.66	71.52	99.58	123.12
16.3	17.91	27.7	41.9	53.99	71.8	99.83	124.62
16.4	18.02	27.93	41.67	53.81	71.7	99.39	123.8
16.5	18.14	28.03	41.73	53.65	71.58	99.64	122.93
16.6	17.96	28.02	41.86	53.93	71.42	100.25	124.1
16.7	18.1	27.74	41.97	53.73	71.7	100.34	124.59
16.8	17.91	27.92	42.2	54.02	72.26	100.3	124.31
16.9	17.86	28.16	41.65	53.71	72.02	100.3	124.33
17	18.16	28.07	42.2	53.77	71.65	100.29	124.45
17.1	18	27.93	41.69	53.92	71.99	100.06	123.62
17.2	18.1	28.1	41.89	53.91	72.2	99.9	123.73
17.3	18	27.77	42.16	53.91	71.5	99.83	123.74
17.4	18.05	27.74	41.84	53.93	71.85	99.84	122.86
17.5	17.94	27.99	42.03	54.03	72.36	99.38	124.57
17.6	18.17	28.16	42.11	53.93	71.93	100.06	123.91
17.7	17.83	27.9	42.15	54.04	71.88	100.12	122.87
17.8	17.92	27.83	42.21	53.86	72.25	100.09	122.85
17.9	18.12	27.88	41.98	53.8	71.86	99.71	123.28
18	17.95	28.18	42.09	53.6	72	99.21	124.53
18.1	18.02	28.14	41.77	53.63	72	100.14	123.25
18.2	18.09	27.81	41.91	54.07	71.42	99.67	123.84
18.3	17.8	27.94	42.01	53.94	71.78	100.07	123.56
18.4	18.17	28.04	41.79	53.96	71.68	99.5	123.75
18.5	18.17	28.2	42.21	53.65	71.42	99.71	123.62
18.6	18.17	27.93	42.02	55.07	71.55	99.18	122.83
18.7	18.18	27.73	41.75	53.67	71.62	100	124.4
18.8	17.98	27.81	41.84	53.83	72.18	100.02	124.08
18.9	17.91	28.12	42.21	53.84	72.2	100	124.19
19	18.19	28.3	41.78	53.67	71.99	99.28	124.11
19.1	18.02	27.82	41.76	54.11	72.26	99.51	124.27
19.2	17.94	28.05	41.76	53.8	71.86	99.64	124.22
19.3	17.9	28.21	42.09	54.08	72.07	99.97	123.87
19.4	17.84	27.77	42.21	53.94	71.65	100.32	123.38
19.5	17.86	27.74	42.16	53.96	71.59	100.37	123.34
19.6	18.09	27.96	42.19	53.86	71.48	99.44	123.33
19.7	17.85	27.93	41.78	53.98	71.89	100.31	124.72
19.8	18.1	27.74	41.81	53.68	72.12	100.06	124.54
19.9	17.92	27.81	42.13	53.72	71.68	99.99	124.06
20	17.82	28.08	42.06	53.64	71.66	99.83	123.06
20.1	18.03	27.92	42.14	54.02	71.92	99.48	122.98
20.2	17.86	28	41.8	53.64	72.37	99.69	123.06
20.3	18.18	28.03	42.2	53.81	71.47	100.36	123.69
20.4	18.09	27.86	42.09	54.11	71.68	100.32	123.53
20.5	17.98	27.9	42.07	53.75	71.76	99.28	122.83
20.6	17.85	28.24	41.99	54.11	71.79	99.43	124.1
20.7	17.81	28.1	41.75	54.12	71.61	100.17	123.32
20.8	18.09	27.98	41.72	54.08	72.37	99.96	123.71
20.9	17.96	28.21	41.81	53.94	71.62	99.52	124.73
21	18.05	28.02	42.23	52.71	71.62	99.52	123.41
21.1	17.87	27.78	42.01	53.97	72.25	100.01	123.42
21.2	17.98	27.92	42.01	53.99	71.41	99.25	123.2
21.3	17.92	28.13	42.03	53.93	72.38	100.29	123.88
21.4	17.89	27.79	41.95	53.73	71.74	99.68	124.7
21.5	17.86	27.96	41.87	54.05	72.41	99.75	123.13
21.6	17.88	28	41.98	53.88	71.45	100.36	123.71
21.7	18.15	27.83	41.95	53.67	71.66	99.73	123.82
21.8	18.18	28.24	41.93	53.68	71.66	99.54	123.92
21.9	17.85	27.95	41.95	54.11	71.64	99.46	123.69
22	18.08	27.93	42.23	54.07	71.48	99.35	123.52
22.1	17.88	28.02	41.85	53.82	72.16	100.28	124.34
22.2	18.2	27.87	41.98	53.84	71.56	99.33	124.02
22.3	18.12	27.75	41.95	54.05	71.49	99.96	123.66
22.4	17.91	27.89	41.82	54.08	72.32	100.04	124.55
22.5	17.99	27.74	41.92	54.13	72.25	100.42	123.7
22.6	18.05	27.73	41.78	53.81	71.53	100.04	124.56
22.7	17.85	28.22	41.92	53.86	71.81	99.4	123.48
22.8	18.06	27.93	41.79	53.66	71.83	99.47	124.65
22.9	18.12	28.18	41.95	54.06	71.99	99.59	123.61
23	17.8	27.96	41.72	53.86	72.4	99.46	123.98
23.1	18.06	27.78	41.97	53.77	71.73	100.15	124.21
23.2	18.04	27.95	42.27	53.9	72.03	99.73	123.43
23.3	18.05	27.73	42.02	53.72	71.97	100.34	124.67
23.4	18.14	27.79	42.23	53.75	72.25	100.14	124.25
23.5	17.92	27.97	42.1	53.75	72.33	99.45	123.07
23.6	17.89	27.81	41.83	53.71	71.58	99.72	123.12
23.7	17.8	28.18	41.77	53.85	72.39	99.32	123.09
23.8	18.05	27.91	41.93	53.68	71.95	99.34	124.37
23.9	18.01	27.79	41.8	53.72	72.43	99.5	123.85
24	17.85	28.13	41.8	54.02	72.31	99.38	123.01
24.1	18.06	27.79	41.71	53.89	72.39	99.86	123.78
24.2	17.92	27.94	42	54.1	72.16	99.55	123.44
24.3	17.88	28	42.24	53.9	72.06	99.37	123.45
24.4	18.03	27.71	41.73	53.9	71.7	100.41	124.52
24.5	17.97	28.02	41.79	54.05	71.72	99.27	124.22
24.6	18.06	27.8	41.79	54.08	71.71	100.15	123.69
24.7	17.86	28.05	41.84	53.78	72.16	100.01	124.35
24.8	18.12	28.28	42.18	54.08	72.14	100.29	124.1
24.9	18.15	27.87	41.8	54.11	72.44	100	123.26
25	17.96	27.8	41.96	53.89	72.1	99.5	124.24
25.1	17.86	28.19	42.04	54	71.73	99.3	123.5
25.2	17.87	28.23	42.04	53.76	72.37	99.87	123.7
25.3	17.8	28.28	42.23	53.77	72.15	99.63	123.31
25.4	18.19	28.22	41.81	53.8	71.85	99.63	124.17
25.5	17.85	28.21	42.05	53.94	72.35	99.35	124.35
25.6	18.13	28.1	42.14	53.7	71.68	99.39	124.5
25.7	17.85	28.14	41.89	54.16	71.86	99.99	123.96
25.8	17.88	27.73	42.05	54.06	72.03	99.37	123.86
25.9	18.05	28.09	42.06	54.19	71.81	99.89	123.97
26	18.05	27.99	41.97	53.76	71.94	99.8	124.84
26.1	18.16	28.25	42.19	53.75	72.38	100.28	123.51
26.2	18.08	27.95	41.82	54.05	71.51	100.32	123.91
26.3	18.05	28.26	42.29	53.7	72.22	99.4	124.22
26.4	18.03	28.02	42.12	53.92	72.44	99.76	123.95
26.5	18.06	27.86	41.81	53.83	72.33	100.18	124.81
26.6	17.97	28.14	41.75	53.71	71.77	100.27	124.07
26.7	17.81	28.19	41.79	54	72.01	100.03	124.11
26.8	18.03	28.05	42.08	53.79	72.15	100.18	124.77
26.9	18.01	27.75	41.82	54.16	72.37	100.01	124.33
27	18.12	27.7	41.84	53.89	71.95	99.59	123.77
27.1	18.14	28.09	42.27	53.87	72.27	99.46	123.04
27.2	18.1	28.28	41.87	53.77	72	100.49	123.52
27.3	18.02	28.04	41.78	53.97	72.37	100.14	123.12
27.4	18.14	27.76	42.27	54.11	72.38	100.36	124.72
27.5	18.09	28.29	41.77	53.8	71.77	99.56	124.74
27.6	18.05	27.91	41.93	53.72	71.95	99.8	124.24
27.7	18.12	27.83	41.81	53.75	71.97	100.06	124.83
27.8	18.04	27.7	42.2	54.05	72.1	100.39	124.83
27.9	18.06	27.7	41.96	53.92	71.62	100.29	124.67
28	17.96	28.25	41.79	54.12	71.96	100.23	123.7
28.1	17.94	28.04	42.29	53.77	72.15	100	123.87
28.2	17.87	28.04	42.04	54.02	72.34	99.91	123.92
28.3	17.98	28.09	42.3	53.8	72.05	100.09	123.26
28.4	18.06	27.81	41.98	53.85	72.48	100.15	124.62
28.5	18.12	27.93	42.18	53.72	72.04	100.45	124.27
28.6	18.01	27.77	42.17	54.23	72.01	100.43	123.56
28.7	18.06	28.05	41.97	54.17	71.82	99.62	124.29
28.8	17.83	27.93	42.12	53.78	71.96	99.62	124.78
28.9	18.14	28.01	42.11	54.04	71.9	99.54	123.24
29	17.93	28.28	41.79	53.87	72.08	100.32	124.35
29.1	18.19	28.01	41.79	53.88	71.78	100.2	124.58
29.2	17.86	28.25	42.06	54.19	71.78	99.43	123.42
29.3	18.02	28	41.77	53.86	72.06	100.37	124.26
29.4	18.03	28.16	42.21	53.83	71.78	99.81	123.18
29.5	17.9	27.99	41.76	53.8	72.15	99.62	123.21
29.6	17.84	27.85	41.72	54.11	71.8	99.96	124.62
29.7	18.14	27.73	42.29	54.11	72.13	100.02	124.77
29.8	18.03	28.27	42.14	54.15	72.47	100.25	123.38
29.9	18.01	28.22	42.08	53.78	72.23	99.46	123.87
30	18.2	27.95	42.27	54.16	71.71	99.37	123.49
30.1	18.12	28.24	42.17	53.87	71.71	100.23	123.55
30.2	18.17	28.27	42.25	53.96	72.21	99.99	123.6
30.3	18.16	27.86	42.32	53.83	71.59	100.12	124.6
30.4	18.14	27.91	41.8	54.24	72.11	100.22	124.41
30.5	18.05	28.13	41.79	54.11	71.67	100.55	124.54
30.6	18.09	28.03	41.84	54.01	72.36	100.02	123.08
30.7	17.91	28.16	41.72	54.06	72.46	99.74	124.12
30.8	17.82	28.26	41.82	54.14	72.45	99.82	124.61
30.9	18.13	27.72	41.95	53.89	71.59	99.98	124.44
31	18.12	28.24	42.24	53.83	72.21	99.5	124.84
31.1	18.18	27.87	42.18	54.07	72.47	99.67	124.63
31.2	17.85	28.3	42.17	54.16	71.99	100.16	123.45
31.3	18.17	28.23	41.74	54.01	71.65	99.64	123.41
31.4	17.92	28.15	41.86	53.95	72.49	100.29	124.13
31.5	17.96	27.75	42.11	54.17	72.02	100.39	123.65
31.6	18.1	27.89	42.24	54.1	72.45	100.27	123.52
31.7	17.88	28.05	42.08	53.77	71.95	100.13	124.6
31.8	18.13	28.26	42.33	53.92	71.61	99.9	123.51
31.9	18.05	27.72	42.27	53.88	72.34	99.49	124.21
32	17.86	28.26	42.13	53.76	72.46	100.2	123.82
32.1	17.9	27.72	42.27	54.22	71.91	99.46	124.41
32.2	18.04	28.02	42.15	54.09	72.12	99.41	123.4
32.3	17.98	28.06	41.79	54.26	71.74	100.41	124.18
32.4	18.14	27.99	42.07	53.87	72.16	99.51	123.16
32.5	17.94	27.83	41.99	53.86	72.42	100.57	123.63
32.6	17.92	28.25	41.78	54.01	72.48	99.88	124.52
32.7	18.09	27.8	41.92	54.04	72.53	99.82	123.35
32.8	18.12	27.94	41.89	54.1	71.85	99.41	124.38
32.9	18.02	28.25	41.87	53.81	71.91	100.3	124.13
33	17.91	28.23	42.13	53.98	72.46	99.8	124.12
33.1	18.08	27.77	42.02	53.81	71.84	100.05	124.16
33.2	18.02	28.03	42.25	54.02	72.14	99.86	124.88
33.3	17.94	27.81	42	54.15	72.5	100.52	123.37
33.4	17.9	28.06	42.01	54.28	71.6	100.44	124.25
33.5	18.18	27.85	41.91	54.05	71.78	99.76	124.08
33.6	18.08	27.73	41.84	54.28	71.69	100.59	123.37
33.7	18.2	28.3	42.05	53.8	72.38	100.32	124.67
33.8	17.94	27.78	42.01	54.08	72.5	100.11	124.89
33.9	17.8	28.2	41.92	54.12	72.38	100.6	124.98
34	17.9	28.07	42.13	53.86	72.34	100.4	123.22
34.1	17.81	28.21	42.25	53.99	72.09	100.56	124.65
34.2	17.85	27.75	42.16	53.86	72.6	99.47	124.07
34.3	17.93	27.71	41.81	54.07	72.26	99.76	123.99
34.4	17.97	28.12	41.8	53.83	71.74	99.9	123.52
34.5	18.13	28.16	42.22	53.95	72.12	99.72	124.21
34.6	18.09	27.74	41.76	53.89	72.42	99.79	123.51
34.7	18	28.07	41.79	54	72.45	100.56	124.54
34.8	18.18	28.19	42.05	53.98	72.16	99.82	123.54
34.9	18.15	27.79	41.98	54.21	72.54	99.94	123.53
35	18.12	28.21	41.85	53.92	71.8	100.57	123.46
35.1	17.93	27.96	42.17	54.04	71.69	99.5	125.05
35.2	18.1	27.95	42.02	54.11	72.4	99.54	123.44
35.3	17.96	27.86	42.06	53.88	72.17	99.81	124.46
35.4	17.9	27.72	42.21	53.82	72.25	100.64	125.02
35.5	17.95	28	42.3	54.24	72.19	100.01	123.38
35.6	17.86	28.08	42.05	52.9	72.5	100.26	124.58
35.7	18.12	27.93	41.98	53.93	71.85	100.49	125.04
35.8	17.98	27.92	41.91	53.95	72.38	100.51	124.44
35.9	17.88	28.25	42.35	53.86	72.34	99.8	123.6
36	18.03	28.26	42.19	54.18	71.83	99.92	124.23
36.1	17.86	27.82	42.23	53.87	71.76	100.57	123.21
36.2	17.83	28.07	42.13	54.06	72.19	99.47	123.23
36.3	17.85	28.29	41.98	53.98	72.25	99.63	123.17
36.4	18.13	27.84	42.11	54.14	72.29	99.5	124.67
36.5	18.08	28.27	41.9	53.95	72.31	100.16	123.63
36.6	17.83	28.13	41.93	54.15	72.36	100.21	124.87
36.7	18.17	27.87	42.34	54.17	72.32	99.51	124.31
36.8	18.09	28.08	42.34	54.3	71.92	99.53	124.99
36.9	18	28.04	42.11	53.91	71.85	100.07	123.76
37	17.8	27.8	42.3	54.03	72.3	99.95	124.28
37.1	18	28.27	42.17	53.9	72.48	99.94	124.64
37.2	17.87	28.29	41.78	54.02	72.1	100.14	123.51
37.3	18.12	28	42.29	54.21	72.59	100.62	125.07
37.4	17.87	27.9	41.8	54.18	71.82	99.87	124.77
37.5	17.95	28.23	42.23	54.01	72.56	100.11	123.57
37.6	18.18	28.08	42.27	53.88	72.58	100.08	124.05
37.7	17.92	27.76	42.34	53.91	71.68	100.04	123.86
37.8	18.09	27.96	42.09	54.35	72.63	100.57	123.58
37.9	17.87	27.72	42.33	53.98	71.69	99.63	124.16
38	18.11	28.26	42.35	54.34	72.26	100.08	124.96
38.1	18.2	27.71	42.23	54.29	72.39	99.97	123.5
38.2	17.82	27.77	41.91	54.16	71.86	99.86	124.14
38.3	18.04	28.11	41.84	54.11	72.53	100.56	124.33
38.4	18.15	28.3	42.12	54.05	72.59	100.01	124.03
38.5	18.14	27.82	41.83	53.87	72.05	99.51	124.38
38.6	17.91	27.87	41.83	54.25	71.69	100.27	125.13
38.7	18.17	27.93	41.79	54.27	72.42	100.36	124.19
38.8	17.85	28.17	41.98	54.34	71.77	99.77	124.43
38.9	18.19	27.82	42.37	53.99	71.77	99.68	125.1
39	18.1	27.85	42.11	53.89	71.87	99.58	124.5
39.1	17.85	27.92	42.18	54.11	72.2	100.54	124.31
39.2	18.14	28.26	42.35	53.99	72.51	100.68	124.62
39.3	18.02	27.76	42.04	53.91	71.8	99.9	123.93
39.4	17.94	27.89	41.91	54.19	72.64	100.32	124.53
39.5	17.92	27.89	41.98	53.94	72.3	99.55	124.47
39.6	17.83	28.13	42.01	54.04	72.15	100.39	124.26
39.7	18.11	27.7	41.94	54.2	72	100.61	123.28
39.8	17.88	28.09	41.79	54	72.66	99.64	124.95
39.9	17.85	28.06	41.8	53.94	72.51	100.06	123.88
40	18.14	27.83	41.88	53.97	72.3	100	123.62
40.1	18.04	28.2	41.83	54.39	72.26	100.66	123.27
40.2	17.82	27.75	41.85	54.38	72.2	100.59	123.99
40.3	17.89	27.73	42.29	54.1	72.16	99.92	124.21
40.4	18.09	27.97	42.35	53.98	72.46	99.65	123.75
40.5	17.98	28.27	41.91	54.3	72.65	100.17	123.53
40.6	17.8	28.22	42.08	54.29	72.46	100.51	123.56
40.7	17.99	28	42.27	54.09	72.08	100.61	124.2
40.8	18.15	28.03	42.2	54.24	71.72	100.14	123.77
40.9	17.94	28.07	42.28	54.26	72.15	100.29	123.96
41	18.01	28.23	42.28	54.33	71.77	100.13	123.59
41.1	18.05	28	42.13	54.08	71.8	99.81	125.01
41.2	18.12	28.24	42.38	54	72.05	100.06	123.35
41.3	18.14	27.88	42.23	54.12	72.59	100.22	124.31
41.4	17.8	27.88	42.26	53.98	72.19	100.01	124.96
41.5	17.96	27.87	42.34	54.05	72.21	100.21	123.9
41.6	17.99	28.14	41.84	54.37	72.41	100.57	124.72
41.7	18.07	27.91	42.23	54.4	72.39	99.7	123.86
41.8	18.09	27.78	42.14	54.2	72.62	100.73	124.38
41.9	18.14	27.99	41.81	54.13	72.21	100.24	124.59
42	17.84	28.03	42.11	54.05	72.18	100.53	123.44
42.1	17.86	28.28	42.31	54.35	71.82	99.61	124.37
42.2	17.98	27.98	41.98	54.35	72.4	100.48	124.53
42.3	17.84	28.16	42.25	54.21	72.16	99.7	125.15
42.4	18.16	27.8	41.95	54.02	72.13	100.23	123.54
42.5	18.16	28.18	41.96	54.42	72.28	99.57	124.44
42.6	18.01	27.7	42.29	54.12	72.2	99.8	124.26
42.7	17.83	27.79	42.21	54.28	72.34	100.27	124.82
42.8	17.94	28	42.12	54.04	72.61	100.15	124.42
42.9	17.84	27.94	41.94	53.95	72.35	100.45	125.15
43	18.06	28.18	41.87	54.16	72.21	99.93	123.36
43.1	17.94	27.72	41.99	54.3	72.63	100.14	125.11
43.2	18.18	28.11	41.86	54.18	72.26	100.73	123.34
43.3	18.11	27.84	42.14	54.3	71.78	99.76	124.57
43.4	18.18	28.15	42.1	54.28	71.84	99.59	124.4
43.5	18.16	28.21	41.83	54.13	71.73	99.81	125.15
43.6	18.1	27.81	42.37	54.37	72.01	100.1	123.68
43.7	18.14	27.72	41.84	54.28	72.57	99.58	124.31
43.8	17.93	27.99	41.98	54.15	72.22	100.4	124.83
43.9	17.92	27.95	41.89	54.12	71.8	99.62	124.11
44	18.13	27.9	42.19	54.39	72.5	100.05	124.62
44.1	18.11	28.17	42.29	54.29	71.85	99.82	123.96
44.2	17.85	27.81	42.32	54.18	71.87	100.38	124.56
44.3	17.93	27.74	42.3	54.19	72.13	99.87	124.04
44.4	18.12	27.93	41.88	54.34	71.85	99.71	123.7
44.5	17.85	28.19	42.38	54.3	71.94	100.37	124.57
44.6	17.87	27.84	42.23	54.23	72.54	100.48	123.68
44.7	18.05	27.88	42.19	54.27	72.64	99.86	124.8
44.8	17.86	27.98	42.37	54.05	72.08	99.93	123.74
44.9	17.89	28.14	42.16	54.4	72.07	99.83	124.56
45	17.87	28.24	42.42	54.27	72.12	99.84	125.24
45.1	17.85	27.8	42.12	54.29	72.09	99.7	124.21
45.2	18.07	27.9	42.25	54.33	72.48	100.51	124.94
45.3	17.99	27.99	42.41	54.22	72.44	99.98	124.42
45.4	18.15	27.92	41.84	54.32	72.64	99.93	123.99
45.5	18.08	28.03	41.95	54.04	72.26	99.68	123.52
45.6	17.96	27.87	42.37	54.25	72.22	100.26	124.68
45.7	18.09	27.71	41.89	54.31	71.82	100.46	124.28
45.8	18.2	27.94	42	54.26	72.77	100.15	124.57
45.9	18.01	28.19	41.86	54.38	72.33	100.32	124.32
46	17.89	28.11	41.91	54.02	72.55	100.06	124.83
46.1	17.8	28.15	42.16	54.47	72.15	100.45	125.33
46.2	18.13	28.07	42.43	54.14	72.45	100	123.88
46.3	18.04	28.2	42.1	54.05	71.84	100.04	125.07
46.4	18.04	27.96	42.02	54.2	72.64	99.62	124.96
46.5	17.98	28.09	41.96	54.47	72.17	100.26	124.27
46.6	17.81	28.12	41.9	54.22	71.93	99.69	124.97
46.7	17.95	27.86	42.09	54.1	72.68	100.74	125.04
46.8	18.06	28	42.16	54.33	71.9	99.98	124.31
46.9	17.9	28.25	41.86	54.25	71.95	99.96	124.38
47	18.18	27.76	41.94	54.21	72.32	100.81	124.26
47.1	17.97	28.13	41.99	54.03	72.17	99.62	123.5
47.2	17.91	28.09	41.91	54.47	72.19	100.65	124.26
47.3	18.04	28.17	42.16	54.19	72.32	100.49	123.61
47.4	17.88	28.06	42.06	54.48	72.2	99.86	123.86
47.5	17.83	27.93	41.95	54.25	72.79	99.92	125.06
47.6	17.99	27.83	42.21	54.03	72.57	99.84	124.52
47.7	17.89	27.73	42.02	54.09	72.69	100.58	123.54
47.8	17.9	27.92	42.29	54.29	72.43	100.02	124.28
47.9	18.15	28.3	41.96	54.51	72.03	99.99	124.94
48	18	27.9	41.87	54.45	72.44	100.47	124.99
48.1	18.13	28.19	41.85	54.2	72.54	100.33	123.72
48.2	17.85	28.22	41.99	54.03	71.93	100.74	124.58
48.3	17.84	27.88	41.88	54.4	72.73	99.81	123.53
48.4	17.91	28.11	42.28	54.15	72.28	99.63	123.99
48.5	17.89	27.89	42.07	54.03	72.58	100.06	125.18
48.6	18.1	27.84	42.44	54.06	72.17	99.95	124.01
48.7	17.96	28.2	42.07	54.28	72.4	99.7	124.2
48.8	18.15	27.87	42.33	54.13	72.52	100.41	124.16
48.9	18.17	28.02	42.11	54.04	71.96	100.55	124.5
49	18.12	28.06	42.25	54.05	72.15	100.07	123.66
49.1	18.08	28.04	41.93	54.24	72	99.83	124.83
49.2	18.16	27.9	42.4	54.33	72.21	100.73	124.93
49.3	17.82	28.16	41.87	54.28	72.65	99.97	125.08
49.4	18	28.03	42.31	54.15	71.9	100.39	125.24
49.5	18.02	28.19	42.24	54.03	72.74	99.88	123.77
49.6	17.96	28.21	42.27	54.13	71.83	99.8	124.28
49.7	17.97	28.08	42.23	54.29	72.62	100.09	124.6
49.8	18.07	28.08	42.23	54.04	71.9	100.77	124.22
49.9	17.94	27.8	42.43	54.24	72.25	100.52	125.24
50	18.17	27.72	42.23	54.51	72.69	100.01	124.65
50.1	17.98	28.3	41.91	54.41	72.07	99.96	124.69
50.2	18.13	27.89	42.03	54.29	72.35	99.83	123.68
50.3	17.94	27.94	42.38	54.3	72.23	100.18	124.99
50.4	17.88	27.97	42.02	54.31	72.57	99.82	124.07
50.5	18.09	28.04	41.9	54.42	72.48	100.51	124.43
50.6	17.85	27.85	42.37	54.23	72.24	100.27	124.5
50.7	18.06	27.84	42.18	54.04	72.17	100.21	124.35
50.8	18.09	27.82	42.26	54.39	71.92	99.96	124.86
50.9	18	28.21	42.43	54.5	72.72	100.14	124.32
51	17.89	28.25	42.08	54.39	72.46	100.46	124.99
51.1	17.81	27.96	41.89	54.22	72.82	99.83	123.58
51.2	18.13	27.83	41.98	54.06	71.92	100.6	124.17
51.3	17.82	28.01	41.92	54.2	72.24	100.75	125.15
51.4	18.01	28.22	42.36	54.49	72.06	100.11	123.78
51.5	18.16	28.12	41.88	54.18	72.76	100.31	123.98
51.6	18.17	27.74	41.96	54.4	72.12	100.16	124.27
51.7	18.18	28.09	42.22	54.46	71.94	100.65	122.78
51.8	18.18	28.19	42.12	54.08	72.64	100.08	124.89
51.9	17.91	28.16	42.07	54.42	72.8	99.71	125.19
52	18.09	28.23	42.24	54.24	72.09	100.65	124.4
52.1	18	27.83	41.95	54.34	73.18	100.62	125.33
52.2	17.85	27.86	41.99	54.12	72.7	99.78	123.64
52.3	17.86	27.82	41.9	54.11	72.14	100.06	124.57
52.4	17.99	28.14	41.95	54.49	72.25	100.01	125
52.5	17.82	28.05	41.96	54.56	72.83	100.83	124.79
52.6	18.15	27.7	42.45	54.33	72.5	100.31	124.94
52.7	18.18	27.7	42.2	54.1	71.9	100.3	123.72
52.8	17.82	28.05	42.26	54.56	72.43	100.28	125.37
52.9	18.14	28.27	42.29	54.33	71.97	100.61	124.83
53	17.95	28.25	42.26	54.57	72.86	100.24	124.9
53.1	18.05	27.75	41.91	54.26	72.4	100.52	125.28
53.2	17.89	28.22	42.34	54.17	72.71	100.22	124.16
53.3	18.08	27.98	42.39	54.55	72.42	100.38	124.55
53.4	17.89	27.9	42.1	54.55	72.86	100.35	123.9
53.5	17.93	27.72	42.42	54.32	72.4	100.62	125.18
53.6	17.95	28.23	41.88	54.42	72.81	100.71	124.44
53.7	18.07	27.95	42.24	54.31	72.66	100.82	125.02
53.8	18.04	28.15	42.38	54.2	72.8	100.61	123.97
53.9	18.19	28.3	42.35	54.43	71.69	100.4	124.11
54	17.97	28.02	42.07	54.54	72.42	100.13	125.5
54.1	17.68	27.86	42.13	54.31	71.77	99.96	123.67
54.2	17.65	27.76	42.2	54.4	71.77	100.7	124.82
54.3	17.32	28.15	42.16	54.3	71.87	100.43	124.06
54.4	17.44	28.19	42.18	54.12	72.2	100.87	125.47
54.5	17.42	28.15	42.13	54.43	72.51	100.52	124.88
54.6	17.34	27.86	42.04	54.18	71.8	100.88	124.62
54.7	17.55	27.79	41.91	54.57	72.64	100.24	125.47
54.8	17.51	27.86	42.36	54.39	72.3	100.79	124.32
54.9	17.41	27.92	42.12	54.17	72.15	100.07	125.2
55	17.35	28.28	42.14	54.56	72	100.69	123.86
55.1	18.02	28.1	42.04	54.15	72.66	99.72	124.69
55.2	18.17	27.96	42.04	54.18	72.51	100.12	124.57
55.3	17.99	27.7	42.33	54.3	72.3	100.58	124.13
55.4	17.88	27.72	42.29	54.14	72.26	100.58	124.89
55.5	17.82	27.09	42.29	54.18	72.2	99.74	124.64
55.6	17.9	26.89	42.16	54.32	72.16	100.82	124.28
55.7	17.8	26.75	42.31	54.39	72.74	100.8	124.17
55.8	18.18	27.06	42.1	54.42	71.83	99.04	125.42
55.9	17.82	26.76	42.33	54.34	72.62	99.91	123.68
56	17.92	27.03	41.9	54.22	71.9	99.86	124.76
56.1	18.19	27.93	42.44	54.15	72.25	98.84	124.9
56.2	17.91	28.13	42.31	54.43	72.51	99.22	123.8
56.3	18.15	28.07	42.42	54.16	71.8	98.8	125.12
56.4	18.18	27.97	42.05	54.38	72.64	99.68	125
56.5	18.13	28.16	42.09	53.75	72.3	100.09	124.92
56.6	17.96	27.72	42.17	54.07	72.15	99.98	124.27
56.7	18.01	28.18	41.94	53.92	72	99.95	126.32
56.8	18.13	28.2	42.24	54.13	72.66	100.06	124.24
56.9	18.13	27.71	42.37	54.59	72.51	100.52	125.06
57	17.81	27.95	42.35	54.13	72.3	100.91	124.43
57.1	18.15	28.01	41.5	54.21	71.87	100.53	124.72
57.2	17.87	28.21	40.92	54.43	72.13	100.73	125.25
57.3	18.17	27.97	41.33	54.16	71.85	100.04	123.78
57.4	18.19	28.25	41.44	54.38	71.94	100.52	124.87
57.5	18.16	28.29	41.4	53.75	72.54	100.82	124.86
57.6	18.11	28.22	41.3	54.07	72.64	99.83	125
57.7	17.87	27.74	41.34	53.92	72.08	100.3	123.96
57.8	18.09	28.21	41.5	53.66	72.07	100.43	125.53
57.9	18.06	28.28	41.45	53.83	72.12	100.71	124.35
58	18.2	28.22	41.32	53.92	71.69	99.77	125.17
58.1	18.01	27.77	42.21	53.85	72.42	100.68	126.38
58.2	17.98	27.71	42.12	53.75	71.77	100.3	124.03
58.3	18.11	27.99	42.1	53.64	71.77	99.93	124.79
58.4	18.11	28.18	42.24	54.49	71.87	100.69	124.12
58.5	17.96	27.71	42.1	54.42	72.2	100.57	124.83
58.6	17.98	28.08	42.05	54.52	72.51	100.16	124.48
58.7	18.16	27.99	42.33	54.5	71.8	100.74	124.05
58.8	17.91	27.99	42.44	54.47	72.64	100.07	124.76
58.9	17.99	28.02	42.4	54.36	72.3	100.4	124.18
59	17.89	28.22	42.3	54.18	72.15	99.77	123.47
59.1	17.91	28.08	42.34	54.32	72	100.04	123.67
59.2	17.95	27.92	42.5	54.28	72.66	100.01	123.68
59.3	18.15	27.78	42.45	54.62	72.51	99.99	124.4
59.4	17.84	28.22	41.91	54.16	72.3	100.78	124.63
59.5	18.11	28	42.36	54.38	72.26	100.7	125.01
59.6	18.18	27.8	42.12	54.25	72.2	100.9	124.06
59.7	18.11	28.3	42.14	54.57	72.16	100.42	124.48
59.8	18.03	27.84	42.04	54.42	71.69	100.15	125.51
59.9	17.82	28.16	42.04	54.16	72.42	99.89	125.13
60	18.18	28.07	42.33	54.33	71.77	99.86	124.68
60.1	18.18	28.16	42.29	54.42	71.77	100.03	124.01
60.2
60.3
60.4
60.5	-2	-2.5	3	8	12	22	32
60.6	-1.73	-2.34	1.8	4.3	9.1	21.45	14.36
60.7	-2.22	-1.75	0.6	2.49	7.18	20.54	13.25
60.8	-1.54	-2.2	-1.5	2.27	6.4	17.76	7.9
60.9	-1.97	-2.26	-3	1.65	6.39	17.14	6.63
61	-2.49	-1.58	-2.99	1.4	1.7	16.14	2.5
61.1	-2.12	-1.58	-3.31	-0.29	1.23	14.81	-0.42
61.2	-2.24	-2.35	-2.96	-1.26	-2.6	11.79	-0.77
61.3	-1.88	-2.46	-3.08	-3	-3.36	11.66	-1.27
61.4	-2.06	-2.14	-3.25	-2.69	-4.74	4.41	-2.15
61.5	-2.39	-2.5	-2.75	-3.23	-5	1.64	-2.28
61.6	-2.21	-1.9	-3.16	-2.84	-4.82	-2.19	-3.82
61.7	-1.63	-1.77	-2.85	-2.74	-4.73	-7.18	-3.98
61.8	-2.06	-2.17	-3.32	-3.29	-5.28	-8	-4.34
61.9	-1.72	-2.16	-2.75	-2.6	-4.81	-7.73	-5.39
62	-2.03	-1.82	-3.15	-2.86	-4.79	-8.15	-6.96
62.1	-1.96	-2.03	-3.27	-3.28	-4.95	-8.02	-9.11
62.2	-1.85	-2.09	-2.77	-3.07	-4.99	-7.77	-10.33
62.3	-1.82	-1.61	-3.05	-2.93	-5.14	-7.94	-11
62.4	-2.34	-2.13	-3.12	-3.26	-4.83	-8.27	-11.45
62.5	-2.12	-1.78	-3.02	-3.3	-4.72	-7.91	-10.92
62.6	-1.5	-1.5	-3.24	-3.38	-4.76	-7.74	-11.04
62.7	-1.71	-2.19	-3.28	-2.98	-4.97	-8.09	-11.18
62.8	-2.28	-2.16	-3.24	-2.94	-4.64	-7.94	-10.85
62.9	-1.52	-2.28	-2.78	-3.27	-4.83	-7.83	-10.9
63	-2.25	-2.46	-2.67	-3.16	-5.13	-7.86	-10.79
63.1	-2.26	-1.82	-2.71	-2.78	-4.81	-7.95	-11.08
63.2	-1.97	-1.81	-3.25	-2.9	-5.36	-8.16	-11.31
63.3	-1.82	-2.27	-2.62	-3.06	-5.15	-8.09	-10.59
63.4	-1.71	-1.9	-3.09	-3.11	-5.11	-8.15	-11.09
63.5	-2.47	-2.32	-2.71	-2.98	-4.82	-7.95	-10.75
63.6	-1.84	-1.97	-3.04	-3.09	-5.31	-7.94	-10.46
63.7	-2.2	-1.5	-2.62	-2.91	-5.36	-8.15	-10.96
63.8	-2.16	-2.36	-2.65	-2.87	-5.29	-7.81	-11.37
63.9	-2	-2.07	-2.89	-3.12	-5.31	-8.17	-10.63
64	-1.77	-2.42	-3.06	-3.21	-5.34	-7.78	-10.42
64.1	-2.16	-2.15	-3.04	-2.71	-5.18	-7.88	-11.02
64.2	-1.67	-1.86	-2.61	-3.03	-5.1	-7.92	-11.32
64.3	-2.37	-1.94	-3.16	-3.27	-4.79	-8.19	-11.24
64.4	-2.27	-2.13	-2.86	-2.98	-4.87	-7.9	-11.08
64.5	-1.93	-1.78	-3.05	-2.72	-4.94	-8.25	-10.98
64.6	-2.37	-2.4	-3.17	-2.89	-4.82	-7.83	-11.02
64.7	-2.3	-2.04	-2.87	-2.68	-4.95	-8.05	-10.49
64.8	-1.92	-1.81	-3.1	-3.23	-4.64	-7.74	-10.45
64.9	-1.73	-1.82	-2.66	-2.81	-5.08	-7.7	-11
65	-2.5	-1.7	-3.21	-2.61	-4.65	-8.04	-11.49
65.1	-1.92	-1.56	-3.02	-2.95	-5.31	-7.82	-11.46
65.2	-2.07	-2.12	-3.22	-2.85	-5.33	-8.3	-10.87
65.3	-2	-1.58	-3.3	-3.32	-5.09	-8	-11.2
65.4	-1.82	-1.67	-3	-2.97	-4.72	-8.06	-10.85
65.5	-1.68	-2.16	-2.95	-2.94	-5.08	-7.93	-11.44
65.6	-2.05	-1.53	-2.65	-3.03	-5.06	-7.81	-10.66
65.7	-1.88	-1.95	-2.8	-3.38	-5.02	-8.11	-10.7
65.8	-1.83	-1.77	-3.2	-2.89	-4.94	-7.95	-10.84
65.9	-1.58	-1.93	-3.2	-3.17	-5.12	-7.71	-11.29
66	-2.44	-2.43	-2.93	-2.83	-4.85	-7.8	-11.37
66.1	-1.6	-2.27	-2.68	-2.99	-5.27	-7.9	-11.24
66.2	-1.61	-2.29	-3.35	-3.27	-5.21	-8.14	-10.63
66.3	-1.96	-2.19	-3.1	-3.16	-5.3	-7.87	-10.64
66.4	-1.99	-2.28	-3.15	-3.14	-4.74	-8.01	-11.18
66.5	-1.92	-1.94	-3.26	-3.14	-5.17	-7.99	-11.22
66.6	-2.28	-2.17	-3.08	-3.22	-5	-7.72	-11.08
66.7	-2.46	-2.19	-2.84	-2.94	-5.1	-7.75	-10.69
66.8	-1.81	-2.02	-3.27	-3.23	-4.7	-7.98	-10.88
66.9	-2.18	-2.28	-2.77	-3.24	-5.24	-7.96	-10.66
67	-2.12	-2.4	-2.81	-3.15	-5.07	-8.18	-10.7
67.1	-1.76	-1.87	-2.65	-3.31	-4.99	-8.21	-10.9
67.2	-1.57	-2.07	-3.34	-3.22	-5.12	-7.89	-11.08
67.3	-1.93	-2.24	-2.84	-3.15	-4.68	-8.27	-10.57
67.4	-2.14	-1.53	-2.7	-2.74	-5.1	-7.99	-11.12
67.5	-2.49	-1.67	-3.01	-3.34	-4.81	-7.83	-10.73
67.6	-1.5	-1.76	-2.99	-3.39	-5.27	-7.92	-11.36
67.7	-1.57	-1.72	-3.04	-3.05	-4.88	-8.08	-10.6
67.8	-2.2	-2.17	-3.02	-2.89	-4.7	-8.07	-10.58
67.9	-2.18	-1.74	-2.68	-2.71	-5.29	-8.16	-11.41
68	-1.87	-2.2	-3.07	-3.28	-4.67	-7.7	-11.26
68.1	-2.33	-1.97	-2.84	-3.14	-5.27	-7.96	-10.46
68.2	-2.46	-2.1	-3.04	-3.11	-5.16	-8.3	-11.23
68.3	-2.32	-2.19	-2.72	-3.06	-4.98	-8.12	-11.39
68.4	-2.23	-1.82	-3.12	-2.83	-4.84	-8.03	-10.56
68.5	-1.87	-2.37	-2.82	-3.13	-4.86	-7.74	-10.47
68.6	-2.17	-2.07	-2.89	-3.03	-5.23	-8.29	-11.09
68.7	-1.99	-2.3	-3.21	-2.84	-5.29	-7.97	-11
68.8	-1.62	-1.53	-2.95	-2.87	-5.4	-7.89	-10.99
68.9	-2.33	-2.15	-3.11	-3.08	-5.27	-7.82	-10.68
69	-1.96	-1.62	-3.01	-2.99	-5.37	-8.11	-10.49
69.1	-1.72	-2.13	-2.73	-2.7	-5.38	-7.87	-10.98
69.2	-2.49	-1.66	-2.73	-2.99	-4.98	-7.71	-10.52
69.3	-2.4	-2.31	-3.11	-2.66	-4.64	-7.74	-11.22
69.4	-2.43	-1.8	-3.27	-3.18	-4.63	-8.08	-10.51
69.5	-2.33	-2.23	-2.62	-2.74	-5.1	-8.11	-11.13
69.6	-1.73	-2.2	-2.92	-3.13	-4.87	-7.91	-10.48
69.7	-2.89	-2.11	-2.78	-2.9	-5.19	-8.06	-10.57
69.8	-2.39	-2.23	-3.01	-2.93	-5.22	-7.77	-11.3
69.9	-1.72	-1.97	-3.1	-3.08	-5.2	-7.86	-10.42
70	-1.71	-2.25	-2.85	-2.83	-4.65	-8.19	-11.27
70.1	-2.43	-1.86	-2.96	-2.73	-5.06	-7.94	-10.77
70.2	-1.54	-2.44	-3.26	-3.38	-4.94	-8.12	-11.2
70.3	-1.8	-1.87	-2.7	-2.76	-5.13	-8.25	-10.88
70.4	-2.26	-2.07	-3	-2.82	-4.77	-8.23	-11.26
70.5	-2.21	-1.89	-3.2	-3.12	-4.78	-8.27	-10.79
70.6	-2.46	-1.88	-3.35	-3.1	-4.87	-8.2	-11.98
70.7	-1.75	-1.71	-3.13	-3.09	-4.73	-7.96	-10.97
70.8	-2.24	-1.78	-3.36	-2.7	-4.71	-8.14	-11.08
70.9	-1.83	-2.39	-2.9	-3.35	-4.98	-8.07	-10.58
71	-2.39	-2.02	-3.22	-3.22	-5.27	-8.1	-11.28
71.1	-1.64	-1.5	-3.01	-3.39	-5.33	-7.74	-10.83
71.2	-1.5	-1.76	-2.9	-3.25	-4.96	-8.23	-11.09
71.3	-1.68	-1.51	-2.71	-3.13	-4.92	-8.19	-11.2
71.4	-1.62	-2.18	-2.95	-3.19	-4.67	-7.76	-10.78
71.5	-1.84	-2.48	-2.67	-2.84	-5.08	-7.97	-10.87
71.6	-2.36	-1.85	-2.8	-3.39	-4.78	-8.09	-10.73
71.7	-2.39	-1.7	-2.89	-3.34	-4.73	-7.76	-11.04
71.8	-1.82	-1.58	-2.65	-2.73	-4.87	-7.74	-11.35
71.9	-1.67	-1.93	-2.86	-3.39	-4.74	-7.94	-11.32
72	-2.31	-2.01	-3.1	-3.36	-4.89	-8.09	-11.46
72.1	-1.84	-2.04	-3.15	-3.14	-5.09	-8.1	-10.9
72.2	-1.85	-1.73	-3	-3.3	-5.09	-8.2	-11.1
72.3	-1.5	-2.24	-3.14	-3.37	-4.68	-8.13	-11.02
72.4	-1.96	-2.99	-2.61	-3.3	-4.8	-8.01	-11.09
72.5	-1.54	-2.08	-3.25	-3.12	-5.33	-7.76	-11.4
72.6	-1.72	-1.77	-3.09	-3.16	-5.03	-8.18	-10.53
72.7	-2.34	-1.79	-2.81	-3.11	-4.85	-7.71	-10.87
72.8	-1.75	-1.89	-2.97	-3.4	-5.83	-7.74	-11.41
72.9	-2.04	-2.43	-2.8	-2.77	-4.89	-8	-10.41
73	-2.39	-1.62	-3.36	-2.73	-5.35	-7.89	-10.52
73.1	-1.97	-1.99	-3.12	-3.29	-5.06	-8.2	-11.41
73.2	-1.8	-1.78	-2.73	-3.35	-4.88	-7.94	-11.9
73.3	-1.81	-1.86	-2.93	-2.69	-5.31	-8.03	-10.72
73.4	-2.21	-2.1	-3.16	-3.14	-5.02	-8.22	-10.41
73.5	-1.69	-1.57	-2.73	-2.97	-4.74	-8.12	-11.01
73.6	-2.27	-1.51	-3.18	-2.78	-5.27	-8.3	-10.55
73.7	-2.06	-1.72	-2.78	-3.18	-5.28	-7.72	-11.48
73.8	-2.31	-1.86	-3.27	-3.03	-4.72	-8.12	-10.75
73.9	-2.36	-1.6	-3.15	-2.79	-5.23	-7.89	-11.23
74	-2.31	-1.96	-2.81	-3.07	-4.79	-7.86	-11.4
74.1	-1.57	-1.69	-2.86	-2.95	-4.92	-8.23	-11.5
74.2	-1.61	-1.95	-2.75	-2.89	-4.66	-7.99	-10.95
74.3	-2.49	-2.1	-3.92	-3.11	-5.36	-7.91	-11.16
74.4	-1.72	-1.63	-3.38	-3.4	-5.32	-7.91	-11.3
74.5	-2.2	-2.17	-3.03	-2.93	-4.97	-7.87	-10.42
74.6	-2.43	-1.75	-3.32	-2.71	-5.3	-8.27	-11.48
74.7	-2.32	-1.5	-2.99	-2.6	-4.83	-8.02	-11.36
74.8	-2.05	-1.86	-2.85	-2.64	-4.99	-8.09	-10.98
74.9	-2.14	-2.08	-2.98	-3.2	-5.11	-8.25	-11.12
75	-2.4	-1.87	-2.96	-2.71	-5.26	-8.1	-10.49
75.1	-1.75	-1.74	-3.35	-3.24	-4.64	-7.89	-10.62
75.2	-2.39	-2	-2.6	-3.21	-4.96	-7.98	-10.74
